# Supplementary material for: Visible-light-induced aerobic oxidation of alcohols to aldehydes/ketones via solvated dispersion intermediates
Source: Royal Society of Chemistry journal article supplement (doi:10.1039/d4gc01210k), 2024-01-01
Supplement: d4gc01210k1.pdf [file d4gc01210k1.pdf]

## **SUPPORTING INFORMATION**

**Visible-Light-Induced Aerobic Oxidation of Alcohols to  
Aldehydes/Ketones via Solvated Dispersion Intermediates**

**Wenlong Lei, Runze Liu, Rengui Li, Yan Liu, Can Li \***

# Contents

|                                                                                                                                                                                                                  |    |
|------------------------------------------------------------------------------------------------------------------------------------------------------------------------------------------------------------------|----|
| General experimental details.....                                                                                                                                                                                | 3  |
| Conditions optimization.....                                                                                                                                                                                     | 4  |
| General procedure for the photocatalytic aerobic oxidation alcohol .....                                                                                                                                         | 4  |
| UV/Vis absorption spectra .....                                                                                                                                                                                  | 5  |
| The Tyndall effect.....                                                                                                                                                                                          | 6  |
| Selectivity and conversion of benzyl alcohol oxidation in EtOAc/CH <sub>2</sub> Cl <sub>2</sub> ratios.....                                                                                                      | 6  |
| EPR study.....                                                                                                                                                                                                   | 6  |
| Quenching Experiments for the Photo-oxidation of Benzyl Alcohol.....                                                                                                                                             | 7  |
| DFT calculation.....                                                                                                                                                                                             | 7  |
| Supplementary Figures and Tables.....                                                                                                                                                                            | 9  |
| <b>Figure S1</b> The irradiation output spectrum of light setup in the reaction.....                                                                                                                             | 9  |
| <b>Figure S2.</b> Performance of the reaction with the solvent dosage of EtOAc.....                                                                                                                              | 10 |
| <b>Figure S3</b> The analysis of residual metal contents by ICP-OES .....                                                                                                                                        | 13 |
| <b>Table S1.</b> Control experiments. ....                                                                                                                                                                       | 14 |
| <b>Figure S4:</b> The photoinduced aerobic oxidation of alcohol by sunlight and the reaction setup .....                                                                                                         | 15 |
| <b>Figure S5:</b> Gram-scale synthesis of benzaldehyde.....                                                                                                                                                      | 16 |
| <b>Figure S6</b> The UV-vis spectra of HBr and BnOH without O <sub>2</sub> under irradiation .....                                                                                                               | 17 |
| <b>Figure S7:</b> The <sup>1</sup> H NMR titration of increasing amounts of EtOAc (bottom to top) into a solution of benzyl alcohol.....                                                                         | 18 |
| <b>Figure S8</b> Using benzyl alcohol as reactant to detect Tyndall effect.....                                                                                                                                  | 19 |
| <b>Figure S9.</b> Tests on Tyndall effect: HBr and BnOH in acetone solution.....                                                                                                                                 | 20 |
| <b>Figure S10.</b> Tests on Tyndall effect: H <sub>2</sub> O and BnOH in EtOAc solution.....                                                                                                                     | 21 |
| <b>Figure S11</b> The size distribution.....                                                                                                                                                                     | 22 |
| <b>Figure 12</b> Selectivity and conversion of BnOH in the mixed solvent of EtOAc and CH <sub>2</sub> Cl <sub>2</sub> in different proportions.....                                                              | 23 |
| <b>Figure S13.</b> TD-DFT calculated absorption spectra for A, B, C and D structures. ....                                                                                                                       | 24 |
| <b>Figure S14.</b> Calculated hydrogen-bonding strengths, ρ <sub>BCP</sub> , and binding energy (BE) of H <sub>2</sub> O-HBr, BnOH-HBr, and BnOH-H <sub>2</sub> O) complexes with the B3LYP/ma-TZVPP level. .... | 25 |
| <b>Table S2.</b> Transition compositions, electronic excitation energy (nm), and the corresponding oscillator strengths for D complex based on TD-DFT method .....                                               | 26 |
| <b>Figure S15.</b> ....                                                                                                                                                                                          | 27 |
| <b>Figure S16</b> The equation of the reaction of H <sub>2</sub> O <sub>2</sub> and HBr .....                                                                                                                    | 29 |
| Spectral ( <sup>1</sup> H NMR & <sup>13</sup> C NMR) Data .....                                                                                                                                                  | 30 |
| References.....                                                                                                                                                                                                  | 49 |

## General experimental details

Commercially available reagents were used without further purification. Analytical grade solvents and commercially available reagents were used to conduct the reactions. 40 wt% hydrogen bromide aqueous solution (HBr); 37 wt.% hydrochloric acid aqueous solution (HCl), 57 wt.% hydriodic acid aqueous solution (HI); 40 wt.% sulfuric acid aqueous solution (H<sub>2</sub>SO<sub>4</sub>). Unless otherwise stated, all reactions were set up in a clear quartz vessel and were stirred with a Teflon-coated magnetic stir bar. Reactions were conducted with visible light irradiation  $\geq 420$  nm (300W Microsolar 300 series xenon light source as light source). Gas chromatograph (GC) measurements were carried out in an Agilent 7890 GC with a flame ionization detector was used to quantify the products, equipping with a HP-5 column (30 m<sup>3</sup> x 0.320 mm<sup>3</sup> x 0.25 mm). GC-MS analysis (Agilent 7890 GC, interfaced with 5975C MS, USA). The thin layer chromatography (TLC) analyses were performed using silica gel glass plates, and the products were obtained by column chromatography on silica gel (200-300 mesh) or aluminum oxide neutral (200-300 mesh). NMR spectra were recorded on Bruker AM-400 MHz or AM-700 MHz spectrometer for proton and carbon magnetic resonance spectra (<sup>1</sup>H NMR and <sup>13</sup>C NMR) in the solvent of deuterated chloroform (CDCl<sub>3</sub>). CDCl<sub>3</sub>: <sup>1</sup>H NMR:  $\delta$  7.26 ppm, singlet peak; <sup>13</sup>C NMR:  $\delta$  77.16 ppm, triplet peak. In reporting spectral data the format ( $\delta$ ) chemical shift (multiplicity, J values in Hz, integration) was used with the following abbreviations: s = singlet, d = doublet, t = triplet, q = quartet, quint = quintuplet, m = multiplet. UV-visible data were recorded over the spectral range of 200-700 nm on a UV-vis spectrophotometer (JASCO V-650) equipped with an integrating sphere. MS data was obtained with Agilent 6540 Accurate-MS spectrometer (Q-TOF). Electron paramagnetic resonance (EPR) spectra were collected on a Bruker EPR A200 spectrometer under ambient conditions. The possible metal residues in the reaction systems are detected by Inductively Coupled Plasma Optical Emission Spectroscopy (ICP-OES), includes all reagents, substrates, glass-wares, and even stir-bars. ICP-OES analysis was performed with Thermo ICP-OES 7300DV (PerkinElmer).

## Conditions optimization.

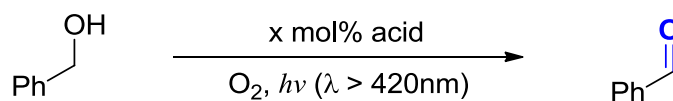

**Visible light-induced benzyl alcohol conversion:** We commenced the photo-induced aerobic alcohol oxidation using benzyl alcohol (BnOH) and O<sub>2</sub> as oxidant with different acids and solvents at ambient temperature under visible light irradiation ( $\lambda \geq 420\text{ nm}$ ). The cylinder reactor is about 80 mm high and 50 mm diameter. The reaction is carry out under O<sub>2</sub> with sealed reactor. The distance of the light source is about 30 cm.

In a clear quartz bottle with a rubber septum and magnetic stirring bar, BnOH (0.1 mmol) and x mol% different acids were added into the 6.0 mL reaction solvent under visible-light irradiation  $\lambda \geq 420\text{ nm}$ , the reaction mixture was stirred under ambient conditions. In the reaction progress was monitored via GC thin layer chromatography or (TLC). The product was determined and analyzed by a gas chromatograph (GC, 7890, Agilent) with a thermal conductivity detector (TCD) and a flame ionization detector (FID), or nuclear magnetic resonance (NMR) spectroscopy.

## General procedure for the photocatalytic aerobic oxidation alcohol

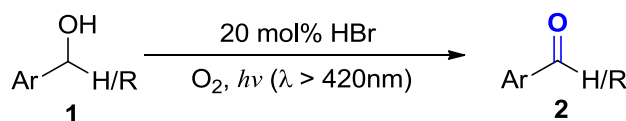

**The experimental procedure:** In a clear quartz bottle with a rubber septum and magnetic stirring bar, substrate (0.2 mmol), 20 mol% HBr were added into the 12.0 mL EtOAc as solvent under visible-light irradiation  $\geq 420\text{ nm}$ , the reaction mixture was stirred under ambient conditions. In the reaction progress can be monitored via GC or TLC. After completion of the reaction, the solvent was removed in vacuo or extraction and the residue was purified by chromatography column on silica gel by petroleum ether/EtOAc to

give the desired product. The some sample was determined and analyzed by GC-FID, using chlorobenzene as internal standard. The PhCHO selectivity refers to overoxidation to benzoic acid.

We commenced the photo-induced aerobic alcohol oxidation using benzyl alcohol (BnOH) and O<sub>2</sub> as oxidant with different acids and solvents at ambient temperature under visible light irradiation ( $\lambda \geq 420$  nm). The cylinder reactor is about 80 mm high and 50 mm diameter. The reaction is carry out under O<sub>2</sub> with sealed reactor. The distance of the light source is about 30 cm.

## UV/Vis absorption spectra

UV/vis absorption spectra between benzyl alcohol and HBr in EtOAc were recorded in path quartz cuvettes using UV-vis spectrophotometer (JASCO V-650).

**As shown in Figure 2a, experimental procedure:**

Br<sub>2</sub>: 0.02 mmol Bromine in 3.0 mL EtOAc

HBr(dark): 0.02 mmol HBr in 3.0 mL EtOAc

HBr(Vis): 0.02 mmol HBr in 3.0 mL EtOAc at 10 minutes under visible-light irradiation  $\geq 420$  nm

HBr(UV): 0.02 mmol HBr in 3.0 mL EtOAc at 10 minutes under visible-light irradiation  $\geq 320$  nm

**As shown in Figure 2b, experimental procedure:**

BnOH(dark): 0.1 mmol benzyl alcohol in 6.0 mL EtOAc

BnOH+HBr (dark): 0.1 mmol benzyl alcohol and 20 mol% HBr in 6.0 mL EtOAc

BnOH+HBr (Vis): 0.1 mmol benzyl alcohol and 20 mol% HBr in 6.0 mL EtOAc at 3 minutes under visible-light irradiation  $\lambda \geq 420$  nm

## The Tyndall effect.

### Using EtOAc solvent observed the Tyndall effect

1-Pyrenemethanol (0.1 mmol) and 20 mol% HBr were added in 3.0 mL EtOAc, we did not observe the Tyndall effect. Introducing 3.0 mL EtOAc into the solution, the Tyndall effect was observed.

### Using CH<sub>2</sub>Cl<sub>2</sub> solvent observed the Tyndall effect

In order to compare the influence of different solvents on the Tyndall effect, CH<sub>2</sub>Cl<sub>2</sub> was used as the reaction solvent. 1-Pyrenemethanol (0.1 mmol) and 20 mol% HBr were added in 3.0 mL CH<sub>2</sub>Cl<sub>2</sub>, we did not observe the Tyndall effect. Introducing 1.0 mL EtOAc into the solution, the Tyndall effect was observed.

## Selectivity and conversion of benzyl alcohol oxidation in EtOAc/CH<sub>2</sub>Cl<sub>2</sub> ratios

**Experimental procedure:** In a clear quartz bottle with a rubber septum and magnetic stirring bar, benzyl alcohol (0.2 mmol), 20 mol% HBr, were added into the 12 mL the mixing solvent EtOAc/CH<sub>2</sub>Cl<sub>2</sub> under visible-light irradiation  $\geq 420$  nm. The constant total volume stoichiometry is 12.0 mL. The different volume ratios of EtOAc/CH<sub>2</sub>Cl<sub>2</sub> were 10:0, 9:1, 8:2, 6:4, 5:5, 0:10 respectively. The product yield was determined by GC.

## EPR study

EPR spectrum was measured on a Bruker ER200DSRC10/12 EPR spectrometer by using DMPO (5,5-dimethyl-1-pyrroline-1-oxide) as a standard.

**Experimental procedure:** In a clear flame-dried quartz bottle with a rubber septum and magnetic stirring bar, benzyl alcohol (0.2 mmol), 20 mol% HBr were added into the 12.0 mL EtOAc as solvent. The reaction mixture was stirred under ambient conditions under

visible-light irradiation  $\geq 420$  nm. After 5 min, DMPO (0.3 mmol) and  $K_2CO_3$  (0.2 mmol) were added. The sample was detected via EPR.

## Quenching Experiments for the Photo-oxidation of Benzyl Alcohol.

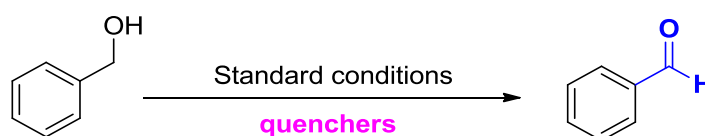

In a clear quartz bottle with a rubber septum and magnetic stirring bar, substrate (0.1 mmol), 20 mol% HBr, quenchers (0.15 mmol) were added into the 6.0 mL EtOAc as solvent under visible-light irradiation  $\geq 420$  nm. The presence of different scavengers: No scavenger (Blank), TEMPO, BHT, BQ,  $CuCl_2$ . The reaction mixture was stirred under ambient conditions. After 15 min, the reaction mixture sample was determined and analyzed by GC-FID.

## DFT calculation

### Computational methods

In the present work, all electronic structure calculations were performed using the Gaussian 16 program suite.<sup>1</sup> Geometry optimizations were carried out based on DFT description for the ground state and TD-DFT descriptions for the excited states. Solvent effects of EtOAc were implicitly taken into account by employing the solvation model based on density (SMD).<sup>2</sup> The (U)CAM-B3LYP<sup>3</sup> functional with TZVP<sup>4</sup> basis set and Grimme's D3<sup>5</sup> dispersion correction (Becke-Johnson damping) was employed in both the DFT and TD-DFT calculations to properly consider dispersion interactions<sup>6</sup> as well as excited states with charge transfer characters.<sup>7</sup> The nature of the optimized stationary points was characterized by the frequency calculations. The wavefunctions for all calculations have been optimized to stabilization for a rational description of open-shell electronic structures. Electrostatic potential (ESP) analysis and charge transfer for excited

state transition was computed with the Multiwfn package.<sup>8</sup> Conical section optimization of the ground and first excited state was performed using TD-DFT method at the same level of theory implemented by ORCA 5.0 package suite.<sup>9</sup>



## Supplementary Figures and Tables

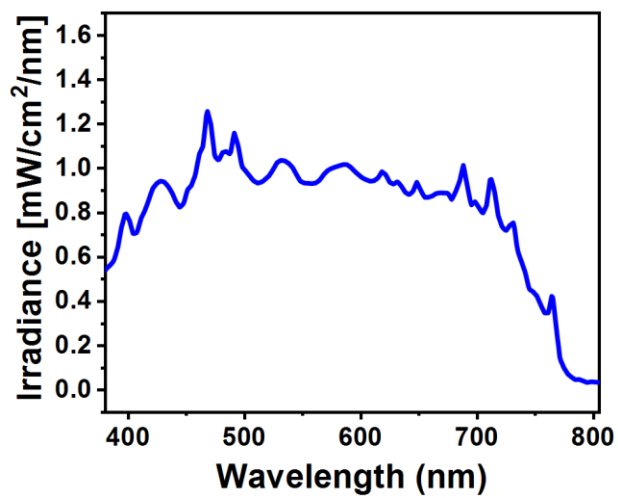

**Figure S1** The irradiation output spectrum of light setup in the reaction.

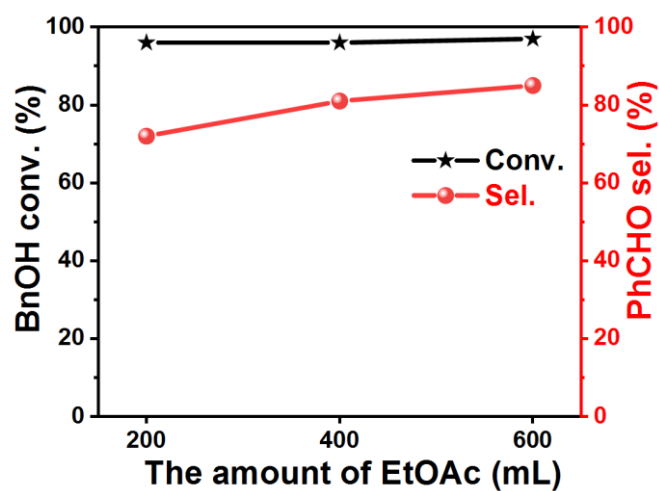

**Figure S2.** Performance of the reaction with the solvent dosage of EtOAc.

**The experimental procedure:** In a clear pyrex glass beaker with a rubber septum and magnetic stirring bar, benzyl alcohol (10 mmol, 1.08 g), 20 mol% HBr were added into 200, 400 or 600 mL EtOAc as solvent under visible-light irradiation  $\geq 420$  nm, the reaction mixture was stirred at ambient conditions. The reaction was monitored by TLC or GC.

| (a) Mean Data: 1608 leiwenlong 2# |                |        |       |           |        |       |                |
|-----------------------------------|----------------|--------|-------|-----------|--------|-------|----------------|
| Analyte                           | Mean Corrected | Calib. |       | Std. Dev. | Sample |       | RSD            |
|                                   | Intensity      | Conc.  | Units |           | Conc.  | Units |                |
| As 228.812                        | 61.0           | 0.003  | mg/L  | 0.0002    | 0.003  | mg/L  | 0.0002 6.57%   |
| Be 313.107                        | -162.2         | -0.001 | mg/L  | 0.0001    | -0.001 | mg/L  | 0.0001 9.47%   |
| Cd 228.802                        | 61.9           | 0.003  | mg/L  | 0.0002    | 0.003  | mg/L  | 0.0002 5.64%   |
| Cr 267.716                        | 15.1           | 0.001  | mg/L  | 0.0006    | 0.001  | mg/L  | 0.0006 43.45%  |
| Co 228.616                        | 1.2            | 0.001  | mg/L  | 0.0006    | 0.001  | mg/L  | 0.0006 66.61%  |
| Cu 327.393                        | 52.8           | 0.001  | mg/L  | 0.0004    | 0.001  | mg/L  | 0.0004 23.89%  |
| Fe 238.204                        | -202.7         | -0.003 | mg/L  | 0.0002    | -0.003 | mg/L  | 0.0002 6.34%   |
| Pb 220.353                        | 54.0           | 0.009  | mg/L  | 0.0071    | 0.009  | mg/L  | 0.0071 78.00%  |
| Mn 257.610                        | -51.8          | -0.008 | mg/L  | 0.0001    | -0.008 | mg/L  | 0.0001 1.28%   |
| Mo 202.031                        | -47.3          | -0.001 | mg/L  | 0.0020    | -0.001 | mg/L  | 0.0020 149.85% |
| Ni 231.604                        | 94.6           | 0.003  | mg/L  | 0.0005    | 0.003  | mg/L  | 0.0005 15.64%  |
| Sb 206.836                        | 8.9            | 0.007  | mg/L  | 0.0048    | 0.007  | mg/L  | 0.0048 66.89%  |
| Se 196.026                        | 400.7          | 0.296  | mg/L  | 0.0188    | 0.296  | mg/L  | 0.0188 6.35%   |
| Sr 407.771                        | 23.6           | 0.002  | mg/L  | 0.0005    | 0.002  | mg/L  | 0.0005 21.97%  |
| Ti 334.940                        | -157.6         | -0.001 | mg/L  | 0.0000    | -0.001 | mg/L  | 0.0000 2.81%   |
| V 290.880                         | -71.8          | 0.004  | mg/L  | 0.0013    | 0.004  | mg/L  | 0.0013 34.33%  |
| Zn 206.200                        | -0.8           | -0.001 | mg/L  | 0.0010    | -0.001 | mg/L  | 0.0010 125.49% |
| Ba 233.527                        | 38.5           | -0.008 | mg/L  | 0.0002    | -0.008 | mg/L  | 0.0002 2.08%   |
| Ag 328.068                        | -17.8          | -0.005 | mg/L  | 0.0002    | -0.005 | mg/L  | 0.0002 4.48%   |
| Ce 413.764                        | -2663.9        | -0.004 | mg/L  | 0.0002    | -0.004 | mg/L  | 0.0002 5.83%   |
| Sm 359.260                        | -491.3         | -0.003 | mg/L  | 0.0001    | -0.003 | mg/L  | 0.0001 3.33%   |
| Ru 240.272                        | -32.7          | -0.000 | mg/L  | 0.0002    | -0.000 | mg/L  | 0.0002 111.40% |
| Au 267.595                        | 38.4           | 0.000  | mg/L  | 0.0011    | 0.000  | mg/L  | 0.0011 502.21% |
| Pd 340.458                        | 13.0           | 0.000  | mg/L  | 0.0002    | 0.000  | mg/L  | 0.0002 450.97% |
| Pt 265.945                        | -93.8          | -0.001 | mg/L  | 0.0014    | -0.001 | mg/L  | 0.0014 102.91% |
| Rh 343.489                        | 328.6          | 0.001  | mg/L  | 0.0007    | 0.001  | mg/L  | 0.0007 64.16%  |
| In 325.609                        | 56.8           | 0.002  | mg/L  | 0.0007    | 0.002  | mg/L  | 0.0007 29.30%  |
| U 385.958                         | -2296.4        | -0.024 | mg/L  | 0.0018    | -0.024 | mg/L  | 0.0018 7.51%   |
| Re 227.525                        | -248.6         | -0.002 | mg/L  | 0.0001    | -0.002 | mg/L  | 0.0001 6.56%   |

| (b) Mean Data: 1608 leiwenlong 3# |                |        |       |           |        |       |                |
|-----------------------------------|----------------|--------|-------|-----------|--------|-------|----------------|
| Analyte                           | Mean Corrected | Calib. |       | Std. Dev. | Sample |       | RSD            |
|                                   | Intensity      | Conc.  | Units |           | Conc.  | Units |                |
| As 228.812                        | 34.2           | 0.002  | mg/L  | 0.0007    | 0.002  | mg/L  | 0.0007 31.94%  |
| Be 313.107                        | -495.6         | -0.001 | mg/L  | 0.0001    | -0.001 | mg/L  | 0.0001 9.64%   |
| Cd 228.802                        | 33.6           | 0.002  | mg/L  | 0.0007    | 0.002  | mg/L  | 0.0007 32.43%  |
| Cr 267.716                        | 47.1           | 0.002  | mg/L  | 0.0005    | 0.002  | mg/L  | 0.0005 31.08%  |
| Co 228.616                        | 30.7           | 0.002  | mg/L  | 0.0011    | 0.002  | mg/L  | 0.0011 68.91%  |
| Cu 327.393                        | 6.2            | 0.001  | mg/L  | 0.0007    | 0.001  | mg/L  | 0.0007 59.95%  |
| Fe 238.204                        | -179.9         | -0.003 | mg/L  | 0.0001    | -0.003 | mg/L  | 0.0001 4.98%   |
| Pb 220.353                        | 10.9           | 0.002  | mg/L  | 0.0110    | 0.002  | mg/L  | 0.0110 666.38% |
| Mn 257.610                        | -115.9         | -0.008 | mg/L  | 0.0000    | -0.008 | mg/L  | 0.0000 0.17%   |
| Mo 202.031                        | 39.5           | 0.004  | mg/L  | 0.0020    | 0.004  | mg/L  | 0.0020 45.65%  |
| Ni 231.604                        | 42.1           | 0.002  | mg/L  | 0.0009    | 0.002  | mg/L  | 0.0009 55.80%  |
| Sb 206.836                        | -0.6           | 0.005  | mg/L  | 0.0071    | 0.005  | mg/L  | 0.0071 153.41% |
| Se 196.026                        | 58.6           | 0.049  | mg/L  | 0.0228    | 0.049  | mg/L  | 0.0228 46.30%  |
| Sr 407.771                        | -40.2          | 0.002  | mg/L  | 0.0001    | 0.002  | mg/L  | 0.0001 5.70%   |
| Ti 334.940                        | -273.1         | -0.002 | mg/L  | 0.0000    | -0.002 | mg/L  | 0.0000 1.28%   |
| V 290.880                         | 222.3          | 0.006  | mg/L  | 0.0008    | 0.006  | mg/L  | 0.0008 14.22%  |
| Zn 206.200                        | -33.6          | -0.002 | mg/L  | 0.0007    | -0.002 | mg/L  | 0.0007 36.51%  |
| Ba 233.527                        | 11.8           | -0.008 | mg/L  | 0.0002    | -0.008 | mg/L  | 0.0002 3.07%   |
| Ag 328.068                        | 31.4           | -0.005 | mg/L  | 0.0005    | -0.005 | mg/L  | 0.0005 10.09%  |
| Ce 413.764                        | -1534.6        | -0.002 | mg/L  | 0.0004    | -0.002 | mg/L  | 0.0004 20.32%  |
| Sm 359.260                        | -132.2         | -0.003 | mg/L  | 0.0003    | -0.003 | mg/L  | 0.0003 10.30%  |
| Ru 240.272                        | -108.9         | -0.001 | mg/L  | 0.0001    | -0.001 | mg/L  | 0.0001 11.03%  |
| Au 267.595                        | -14.5          | -0.000 | mg/L  | 0.0002    | -0.000 | mg/L  | 0.0002 262.41% |
| Pd 340.458                        | 28.4           | 0.000  | mg/L  | 0.0003    | 0.000  | mg/L  | 0.0003 230.66% |
| Pt 265.945                        | -118.9         | -0.002 | mg/L  | 0.0004    | -0.002 | mg/L  | 0.0004 26.02%  |
| Rh 343.489                        | 559.5          | 0.002  | mg/L  | 0.0006    | 0.002  | mg/L  | 0.0006 29.97%  |
| In 325.609                        | 18.9           | 0.002  | mg/L  | 0.0018    | 0.002  | mg/L  | 0.0018 107.00% |
| U 385.958                         | -138.4         | -0.001 | mg/L  | 0.0006    | -0.001 | mg/L  | 0.0006 45.74%  |
| Re 227.525                        | -24.3          | -0.000 | mg/L  | 0.0001    | -0.000 | mg/L  | 0.0001 86.88%  |

| Mean Data: 1608 leiwenlong 4# |            |                          |             |              |           |                    |                |
|-------------------------------|------------|--------------------------|-------------|--------------|-----------|--------------------|----------------|
| (c)                           | Analyte    | Mean Corrected Intensity | Conc. Units | Calib. Units | Std. Dev. | Sample Conc. Units | Std. Dev. RSD  |
|                               | As 228.812 | 3.8                      | 0.002 mg/L  | 0.0009       | 0.0009    | 0.002 mg/L         | 0.0009 49.29%  |
|                               | Be 313.107 | -311.7                   | -0.001 mg/L | 0.0001       | 0.0001    | -0.001 mg/L        | 0.0001 9.71%   |
|                               | Cd 228.802 | 6.7                      | 0.002 mg/L  | 0.0009       | 0.0009    | 0.002 mg/L         | 0.0009 48.81%  |
|                               | Cr 267.716 | -10.4                    | 0.001 mg/L  | 0.0006       | 0.0006    | 0.001 mg/L         | 0.0006 63.28%  |
|                               | Co 228.616 | 41.2                     | 0.002 mg/L  | 0.0008       | 0.0008    | 0.002 mg/L         | 0.0008 44.77%  |
|                               | Cu 327.393 | 118.2                    | 0.002 mg/L  | 0.0002       | 0.0002    | 0.002 mg/L         | 0.0002 7.97%   |
|                               | Fe 238.204 | -119.1                   | -0.002 mg/L | 0.0005       | 0.0005    | -0.002 mg/L        | 0.0005 22.44%  |
|                               | Pb 220.353 | 8.3                      | 0.001 mg/L  | 0.0021       | 0.0021    | 0.001 mg/L         | 0.0021 171.74% |
|                               | Mn 257.610 | -86.2                    | -0.008 mg/L | 0.0000       | 0.0000    | -0.008 mg/L        | 0.0000 0.57%   |
|                               | Mo 202.031 | -26.6                    | 0.000 mg/L  | 0.0009       | 0.0009    | 0.000 mg/L         | 0.0009 >999.9% |
|                               | Ni 231.604 | 98.4                     | 0.003 mg/L  | 0.0006       | 0.0006    | 0.003 mg/L         | 0.0006 17.29%  |
|                               | Sb 206.836 | -26.0                    | -0.002 mg/L | 0.0057       | 0.0057    | -0.002 mg/L        | 0.0057 236.76% |
|                               | Se 196.026 | 23.7                     | 0.024 mg/L  | 0.0098       | 0.0098    | 0.024 mg/L         | 0.0098 41.00%  |
|                               | Sr 407.771 | -51.8                    | 0.002 mg/L  | 0.0001       | 0.0001    | 0.002 mg/L         | 0.0001 6.97%   |
|                               | Ti 334.940 | -229.2                   | -0.002 mg/L | 0.0001       | 0.0001    | -0.002 mg/L        | 0.0001 7.05%   |
|                               | V 290.880  | -245.1                   | 0.003 mg/L  | 0.0007       | 0.0007    | 0.003 mg/L         | 0.0007 27.76%  |
|                               | Zn 206.200 | 2.9                      | -0.001 mg/L | 0.0010       | 0.0010    | -0.001 mg/L        | 0.0010 148.03% |
|                               | Ba 233.527 | 45.8                     | -0.007 mg/L | 0.0000       | 0.0000    | -0.007 mg/L        | 0.0000 0.46%   |
|                               | Ag 328.068 | 58.5                     | -0.005 mg/L | 0.0001       | 0.0001    | -0.005 mg/L        | 0.0001 2.78%   |
|                               | Ce 413.764 | -942.9                   | -0.001 mg/L | 0.0014       | 0.0014    | -0.001 mg/L        | 0.0014 125.05% |
|                               | Sm 359.260 | -113.7                   | -0.003 mg/L | 0.0002       | 0.0002    | -0.003 mg/L        | 0.0002 6.43%   |
|                               | Ru 240.272 | -82.2                    | -0.001 mg/L | 0.0007       | 0.0007    | -0.001 mg/L        | 0.0007 134.01% |
|                               | Au 267.595 | -89.4                    | -0.001 mg/L | 0.0002       | 0.0002    | -0.001 mg/L        | 0.0002 36.01%  |
|                               | Pd 340.458 | 46.9                     | 0.000 mg/L  | 0.0002       | 0.0002    | 0.000 mg/L         | 0.0002 108.38% |
|                               | Pt 265.945 | -137.8                   | -0.002 mg/L | 0.0006       | 0.0006    | -0.002 mg/L        | 0.0006 28.85%  |
|                               | Rh 343.489 | 518.4                    | 0.002 mg/L  | 0.0003       | 0.0003    | 0.002 mg/L         | 0.0003 14.61%  |
|                               | In 325.609 | 110.6                    | 0.003 mg/L  | 0.0008       | 0.0008    | 0.003 mg/L         | 0.0008 28.43%  |
|                               | U 385.958  | -2883.9                  | -0.030 mg/L | 0.0014       | 0.0014    | -0.030 mg/L        | 0.0014 4.66%   |
|                               | Re 227.525 | -54.8                    | -0.000 mg/L | 0.0002       | 0.0002    | -0.000 mg/L        | 0.0002 54.38%  |

| Mean Data: 1608 leiwenlong 5# |            |                          |             |              |           |                    |                |
|-------------------------------|------------|--------------------------|-------------|--------------|-----------|--------------------|----------------|
| (d)                           | Analyte    | Mean Corrected Intensity | Conc. Units | Calib. Units | Std. Dev. | Sample Conc. Units | Std. Dev. RSD  |
|                               | As 228.812 | 8.0                      | 0.002 mg/L  | 0.0002       | 0.0002    | 0.002 mg/L         | 0.0002 8.96%   |
|                               | Be 313.107 | -254.3                   | -0.001 mg/L | 0.0001       | 0.0001    | -0.001 mg/L        | 0.0001 6.86%   |
|                               | Cd 228.802 | 9.5                      | 0.002 mg/L  | 0.0001       | 0.0001    | 0.002 mg/L         | 0.0001 7.18%   |
|                               | Cr 267.716 | -2.3                     | 0.001 mg/L  | 0.0007       | 0.0007    | 0.001 mg/L         | 0.0007 71.92%  |
|                               | Co 228.616 | 65.3                     | 0.002 mg/L  | 0.0006       | 0.0006    | 0.002 mg/L         | 0.0006 24.09%  |
|                               | Cu 327.393 | 158.3                    | 0.002 mg/L  | 0.0004       | 0.0004    | 0.002 mg/L         | 0.0004 18.20%  |
|                               | Fe 238.204 | -149.3                   | -0.003 mg/L | 0.0005       | 0.0005    | -0.003 mg/L        | 0.0005 20.56%  |
|                               | Pb 220.353 | 7.8                      | 0.001 mg/L  | 0.0056       | 0.0056    | 0.001 mg/L         | 0.0056 500.11% |
|                               | Mn 257.610 | -131.6                   | -0.008 mg/L | 0.0001       | 0.0001    | -0.008 mg/L        | 0.0001 1.11%   |
|                               | Mo 202.031 | -24.3                    | 0.000 mg/L  | 0.0003       | 0.0003    | 0.000 mg/L         | 0.0003 119.51% |
|                               | Ni 231.604 | 8.1                      | 0.001 mg/L  | 0.0010       | 0.0010    | 0.001 mg/L         | 0.0010 159.77% |
|                               | Sb 206.836 | 4.2                      | 0.006 mg/L  | 0.0033       | 0.0033    | 0.006 mg/L         | 0.0033 56.58%  |
|                               | Se 196.026 | 2.3                      | 0.009 mg/L  | 0.0177       | 0.0177    | 0.009 mg/L         | 0.0177 206.66% |
|                               | Sr 407.771 | -30.7                    | 0.002 mg/L  | 0.0001       | 0.0001    | 0.002 mg/L         | 0.0001 3.58%   |
|                               | Ti 334.940 | -248.9                   | -0.002 mg/L | 0.0001       | 0.0001    | -0.002 mg/L        | 0.0001 5.58%   |
|                               | V 290.880  | -310.3                   | 0.002 mg/L  | 0.0013       | 0.0013    | 0.002 mg/L         | 0.0013 58.43%  |
|                               | Zn 206.200 | 7.8                      | -0.000 mg/L | 0.0009       | 0.0009    | -0.000 mg/L        | 0.0009 179.04% |
|                               | Ba 233.527 | 39.6                     | -0.008 mg/L | 0.0002       | 0.0002    | -0.008 mg/L        | 0.0002 2.25%   |
|                               | Ag 328.068 | 88.7                     | -0.005 mg/L | 0.0003       | 0.0003    | -0.005 mg/L        | 0.0003 5.66%   |
|                               | Ce 413.764 | -3196.4                  | -0.005 mg/L | 0.0002       | 0.0002    | -0.005 mg/L        | 0.0002 3.20%   |
|                               | Sm 359.260 | -330.5                   | -0.003 mg/L | 0.0004       | 0.0004    | -0.003 mg/L        | 0.0004 12.87%  |
|                               | Ru 240.272 | -127.6                   | -0.001 mg/L | 0.0005       | 0.0005    | -0.001 mg/L        | 0.0005 60.18%  |
|                               | Au 267.595 | -60.2                    | -0.000 mg/L | 0.0002       | 0.0002    | -0.000 mg/L        | 0.0002 51.72%  |
|                               | Pd 340.458 | 36.1                     | 0.000 mg/L  | 0.0004       | 0.0004    | 0.000 mg/L         | 0.0004 233.41% |
|                               | Pt 265.945 | -98.0                    | -0.001 mg/L | 0.0005       | 0.0005    | -0.001 mg/L        | 0.0005 32.05%  |
|                               | Rh 343.489 | 220.2                    | 0.001 mg/L  | 0.0009       | 0.0009    | 0.001 mg/L         | 0.0009 126.70% |
|                               | Re 227.525 | -241.4                   | -0.002 mg/L | 0.0003       | 0.0003    | -0.002 mg/L        | 0.0003 17.37%  |

(e) Mean Data: 1608 leiwenlong 6#

| Analyte    | Mean Corrected Intensity | Calib. Conc. Units | Std. Dev. | Sample Conc. Units | Std. Dev. | RSD     |
|------------|--------------------------|--------------------|-----------|--------------------|-----------|---------|
| As 228.812 | -22.6                    | 0.001 mg/L         | 0.0001    | 0.001 mg/L         | 0.0001    | 6.62%   |
| Be 313.107 | -394.5                   | -0.001 mg/L        | 0.0000    | -0.001 mg/L        | 0.0000    | 2.84%   |
| Cd 228.802 | -25.0                    | 0.001 mg/L         | 0.0000    | 0.001 mg/L         | 0.0000    | 3.36%   |
| Cr 267.716 | -25.2                    | 0.001 mg/L         | 0.0009    | 0.001 mg/L         | 0.0009    | 126.11% |
| Co 228.616 | 87.8                     | 0.003 mg/L         | 0.0007    | 0.003 mg/L         | 0.0007    | 24.66%  |
| Cu 327.393 | 108.8                    | 0.002 mg/L         | 0.0008    | 0.002 mg/L         | 0.0008    | 43.96%  |
| Fe 238.204 | -201.0                   | -0.003 mg/L        | 0.0003    | -0.003 mg/L        | 0.0003    | 10.52%  |
| Pb 220.353 | -30.5                    | -0.005 mg/L        | 0.0040    | -0.005 mg/L        | 0.0040    | 73.43%  |
| Mn 257.610 | -104.9                   | -0.008 mg/L        | 0.0000    | -0.008 mg/L        | 0.0000    | 0.54%   |
| Mo 202.031 | -10.2                    | 0.001 mg/L         | 0.0011    | 0.001 mg/L         | 0.0011    | 92.13%  |
| Ni 231.604 | 30.7                     | 0.001 mg/L         | 0.0010    | 0.001 mg/L         | 0.0010    | 76.20%  |
| Sb 206.836 | 2.7                      | 0.005 mg/L         | 0.0062    | 0.005 mg/L         | 0.0062    | 112.87% |
| Se 196.026 | 23.4                     | 0.024 mg/L         | 0.0207    | 0.024 mg/L         | 0.0207    | 87.08%  |
| Sr 407.771 | 23.9                     | 0.002 mg/L         | 0.0002    | 0.002 mg/L         | 0.0002    | 9.34%   |
| Ti 334.940 | -319.8                   | -0.002 mg/L        | 0.0001    | -0.002 mg/L        | 0.0001    | 8.27%   |
| V 290.880  | -331.9                   | 0.002 mg/L         | 0.0012    | 0.002 mg/L         | 0.0012    | 59.50%  |
| Zn 206.200 | 40.4                     | 0.001 mg/L         | 0.0004    | 0.001 mg/L         | 0.0004    | 69.59%  |
| Ba 233.527 | 51.1                     | -0.007 mg/L        | 0.0002    | -0.007 mg/L        | 0.0002    | 3.18%   |
| Ag 328.068 | -54.4                    | -0.006 mg/L        | 0.0005    | -0.006 mg/L        | 0.0005    | 9.43%   |
| Ce 413.764 | -1533.9                  | -0.002 mg/L        | 0.0005    | -0.002 mg/L        | 0.0005    | 25.27%  |
| Sm 359.260 | -119.4                   | -0.003 mg/L        | 0.0002    | -0.003 mg/L        | 0.0002    | 6.27%   |
| Ru 240.272 | -30.5                    | -0.000 mg/L        | 0.0003    | -0.000 mg/L        | 0.0003    | 152.54% |
| Au 267.595 | -69.4                    | -0.000 mg/L        | 0.0005    | -0.000 mg/L        | 0.0005    | 118.89% |
| Pd 340.458 | 22.2                     | 0.000 mg/L         | 0.0001    | 0.000 mg/L         | 0.0001    | 159.74% |
| Pt 265.945 | -136.8                   | -0.002 mg/L        | 0.0011    | -0.002 mg/L        | 0.0011    | 53.74%  |
| Rh 343.489 | 680.0                    | 0.002 mg/L         | 0.0004    | 0.002 mg/L         | 0.0004    | 17.00%  |
| In 325.609 | -55.3                    | 0.001 mg/L         | 0.0014    | 0.001 mg/L         | 0.0014    | 197.67% |
| U 385.958  | -91.9                    | -0.001 mg/L        | 0.0016    | -0.001 mg/L        | 0.0016    | 206.62% |
| Re 227.525 | -87.2                    | -0.001 mg/L        | 0.0002    | -0.001 mg/L        | 0.0002    | 32.19%  |

**Figure S3** The analysis of residual metal contents by ICP-OES: (a) reaction solution (b) BnOH (c) HBr (d) EtOAc (e) glasswares and stirbars in water solvent.

**Table S1.** Control experiments.

| Entry <sup>[a]</sup> | catalyst                                                                  | Conversion<br>[%] <sup>[b]</sup> | selectivity[%] <sup>[b]</sup> |
|----------------------|---------------------------------------------------------------------------|----------------------------------|-------------------------------|
| 1                    | HBr                                                                       | 93                               | 97                            |
| 2                    | No O <sub>2</sub>                                                         | -                                | -                             |
| 3                    | No <i>hν</i>                                                              | -                                | -                             |
| 4                    | No Br <sup>-</sup> (40 wt% H <sub>2</sub> SO <sub>4</sub> instesd of HBr) | -                                | -                             |
| 5                    | No Br <sup>-</sup> (HCl instesd of HBr)                                   | -                                | -                             |
| 6                    | No Br <sup>-</sup> (HI instesd of HBr)                                    | 18                               | > 90                          |
| 7                    | No H <sup>+</sup> (KBr instesd of HBr)                                    | -                                | -                             |
| 8                    | No H <sup>+</sup> (NBu <sub>4</sub> Br instesd of HBr)                    | -                                | -                             |
| 9                    | 10 mol% H <sub>2</sub> O instesd of HBr                                   | -                                | -                             |
| 10                   | 20 mol% H <sub>2</sub> O instesd of HBr                                   | -                                | -                             |
| 11                   | 40 mol% H <sub>2</sub> O instesd of HBr                                   | -                                | -                             |
| 12                   | 80 mol% H <sub>2</sub> O instesd of HBr                                   | -                                | -                             |
| 13                   | 20 mol% HCl and 63 mol% H <sub>2</sub> O                                  | -                                | -                             |
| 14                   | 20 mol% HI and 27 mol% H <sub>2</sub> O                                   | 16                               | 98                            |

<sup>[a]</sup> Reaction conditions: benzyl alcohol (0.1 mmol), 20 mol% HBr or others, 6.0 mL solvent, under ambient conditions, reaction time: 15 min, visible light irradiation  $\geq 420$  nm. <sup>[b]</sup> Products were quantified by GC with chlorobenzene as an internal standard.

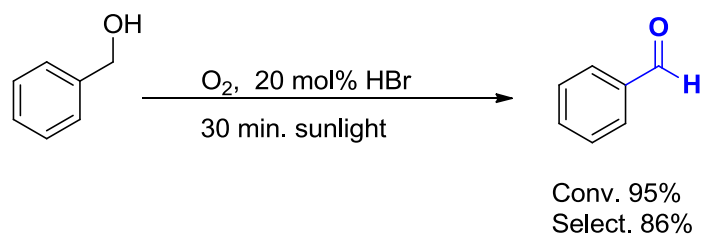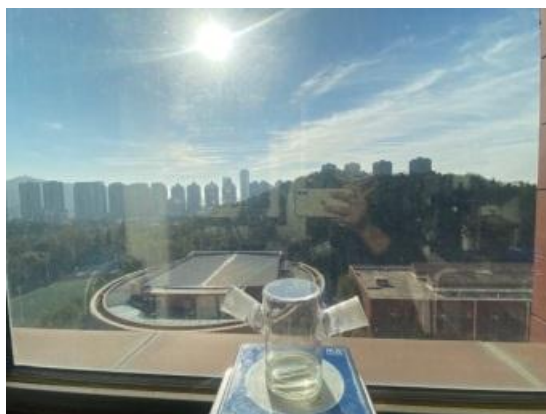

**Figure S4:** The photoinduced aerobic oxidation of alcohol by sunlight and the reaction setup

**The experimental procedure:** In a clear quartz bottle with a rubber septum and magnetic stirring bar, benzyl alcohol (0.2 mmol), 20 mol% HBr were added into the 12.0 mL EtOAc as solvent under sunlight, the reaction mixture was stirred under ambient conditions. In the reaction progress was monitored via GC.

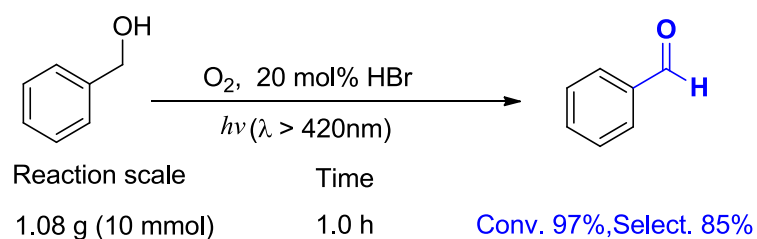

**Figure S5:** Gram-scale synthesis of benzaldehyde

**The experimental procedure:** In a clear pyrex glass beaker with a rubber septum and magnetic stirring bar, benzyl alcohol (10 mmol, 1.08 g), 20 mol% HBr were added into 600 mL EtOAc as solvent under visible-light irradiation  $\geq 420$  nm, the reaction mixture was stirred at ambient conditions. The reaction was monitored by TLC or GC. After completion of the reaction, it was determined using GC.



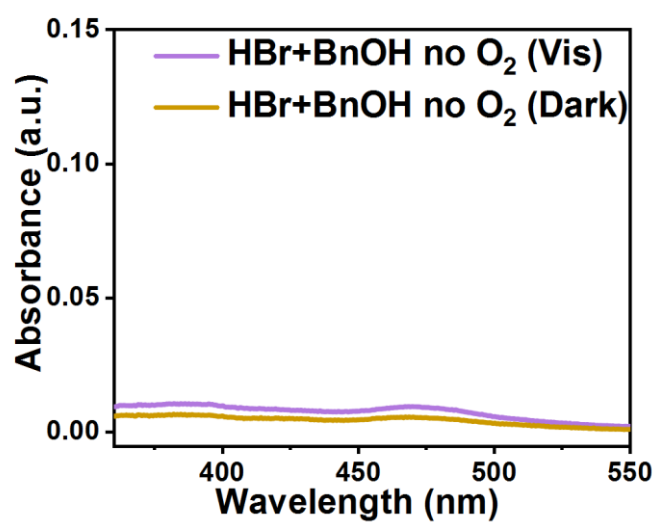

**Figure S6** The UV-vis spectra of HBr and BnOH without O<sub>2</sub> under irradiation (visible light) and in dark.

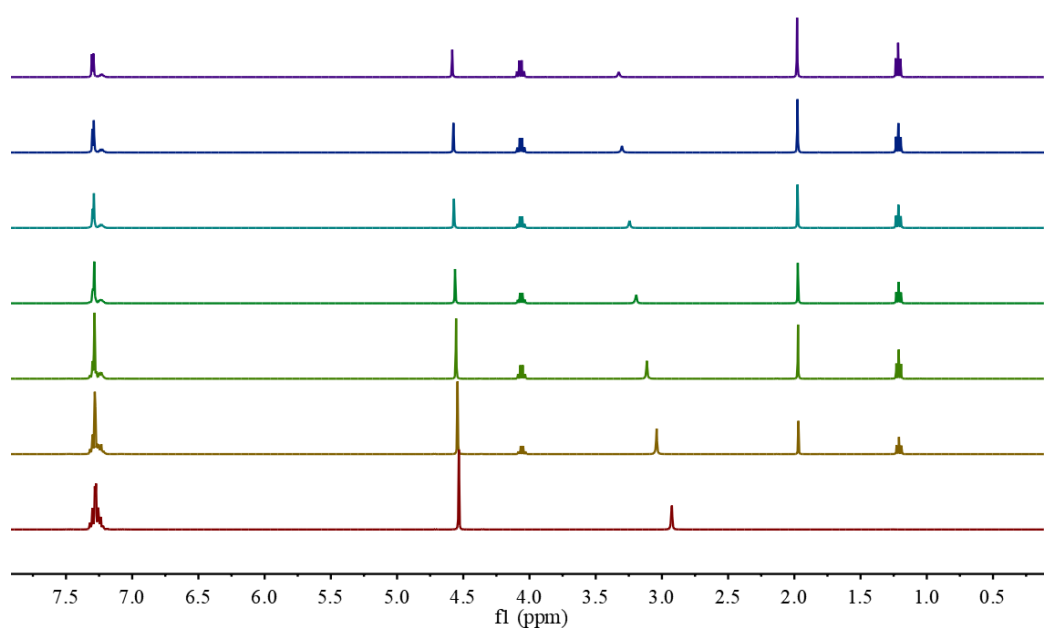

**Figure S7:** The <sup>1</sup>H NMR titration of increasing amounts of EtOAc (bottom to top) into a solution of benzyl alcohol.

<sup>1</sup>H titrations between benzyl alcohol and EtOAc: The concentration of benzyl alcohol was 1.23 mM in CDCl<sub>3</sub> and concentrations of EtOAc were 0 mM, 0.246 mM, 0.615 mM, 0.923 mM, 1.23 mM, 1.54 mM, 1.85 mM.

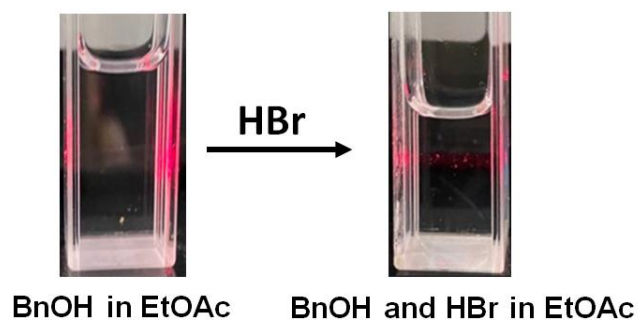

**Figure S8** Using benzyl alcohol as reactant to detect Tyndall effect.

In order to detect the Tyndall effect, ethyl acetate (EtOAc) was used as the reaction solvent. Benzyl alcohol (0.1mmol) was adding in 3.0 mL EtOAc, we did not observe the Tyndall effect. Introducing 20 mol% HBr into the solution, the Tyndall effect was observed.

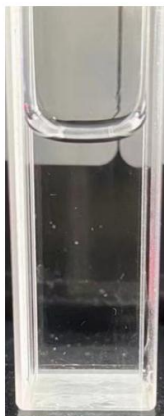

**Figure S9.** Tests on Tyndall effect: HBr and BnOH in acetone solution

In order to detect the Tyndall effect, acetone was used as the reaction solvent. Benzyl alcohol (0.1mmol) and 20 mol% HBr were adding in acetone solution.

The carbonyl groups of ethyl acetate or acetone solvent both seem to form hydrogen bonds with the substrates of alcohol –OH groups, but the reaction performance and Tyndall effect show different, which may be due to the differences in hydrophilicity, polarity and solvent effects of the two solvents.<sup>10, 11</sup>

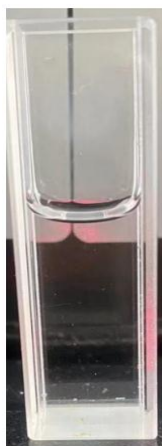

**Figure S10.** Tests on Tyndall effect: H<sub>2</sub>O and BnOH in EtOAc solution

In order to detect the Tyndall effect, EtOAc was used as the reaction solvent. Benzyl alcohol (0.1mmol) and 20 mol% H<sub>2</sub>O were adding in EtOAc solution.

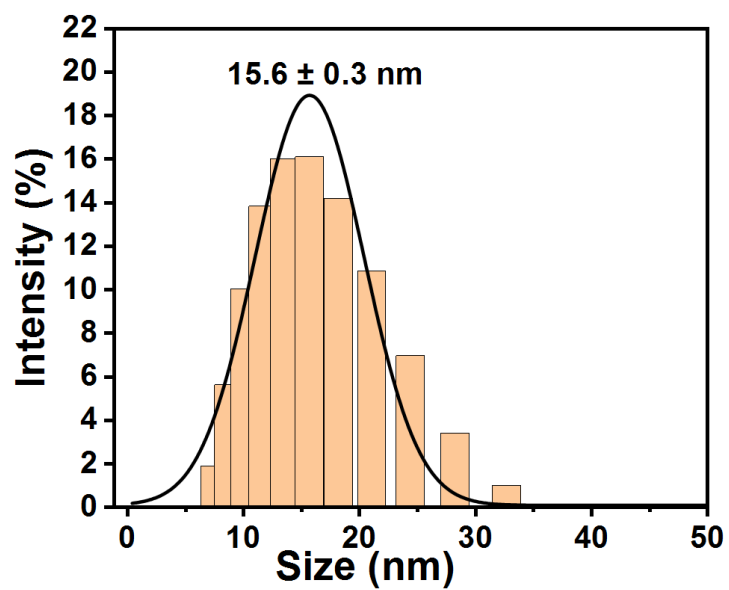

**Figure S11** The size distribution

**Experimental procedure:** 1-Pyrenemethanol and 20 mol% HBr based on 1-Pyrenemethanol were adding in 6.0 mL EtOAc.

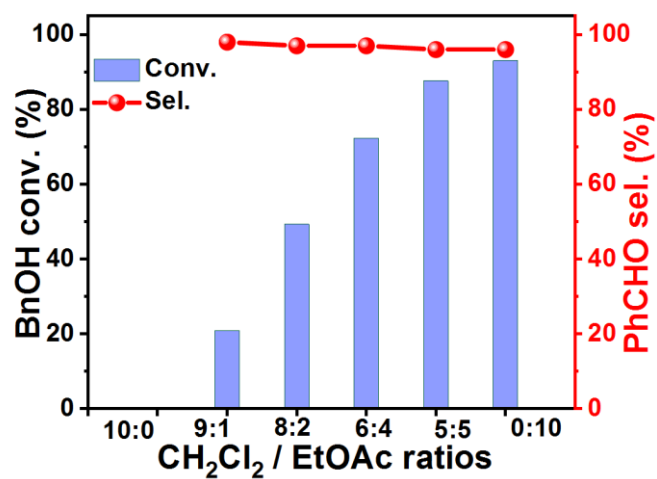

**Figure 12** Selectivity and conversion of BnOH in the mixed solvent of EtOAc and CH<sub>2</sub>Cl<sub>2</sub>

in different proportions.

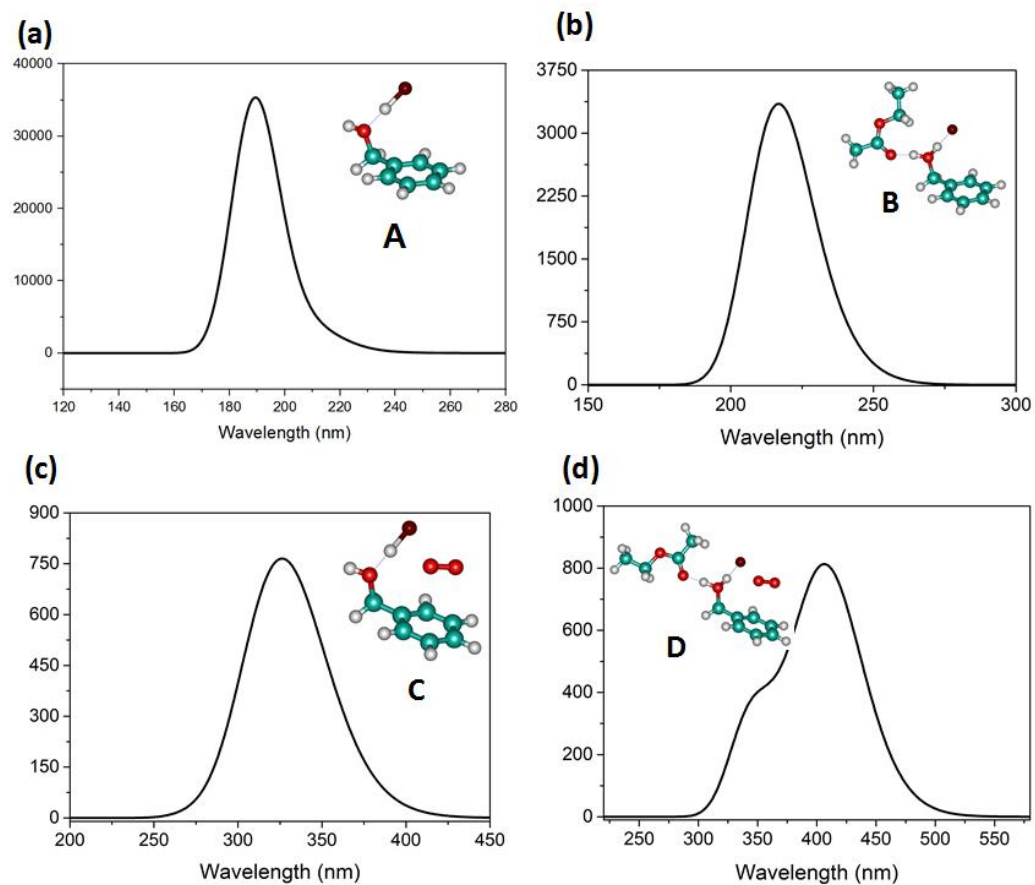

**Figure S13.** TD-DFT calculated absorption spectra for A, B, C and D structures.



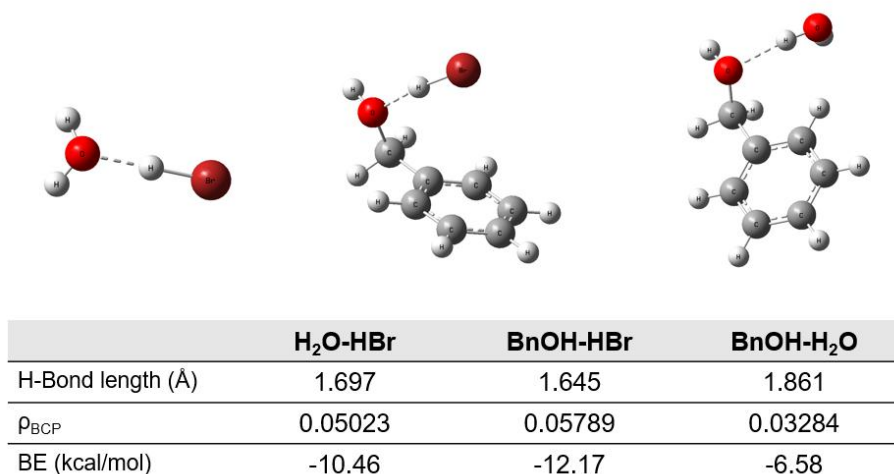

**Figure S14.** Calculated hydrogen-bonding strengths,  $\rho_{\text{BCP}}$ , and binding energy (BE) of H<sub>2</sub>O-HBr, BnOH-HBr, and BnOH-H<sub>2</sub>O complexes with the B3LYP/ma-TZVPP level.

We examined the hydrogen-bonding strengths for H<sub>2</sub>O-HBr, BnOH-HBr, and BnOH-H<sub>2</sub>O complexes. When H<sub>2</sub>O and BnOH molecules both exist in the EtOAc solution, there is a competition for hydrogen bonding between HBr-H<sub>2</sub>O and HBr-BnOH. In order to quantitatively clarify the hydrogen bonding energy, we utilized the method developed by Emamian *et al.*<sup>12</sup>, which allows for accurate estimation of the binding energy (BE) of intermolecular hydrogen bonds through the below fitted equation based on high-level quantum chemical calculations (CCSD(T)/jul-cc-pVDZ + counterpoise):

$$\text{BE}/(\text{kcal/mol}) = -223.08 \cdot \rho_{\text{BCP}} + 0.7423$$

Where  $\rho_{\text{BCP}}$  is the electron density at bond critical point (hydrogen bond). Hence, we calculated the  $\rho_{\text{BCP}}$  for the three H-bonding structures (H<sub>2</sub>O-HBr, BnOH-HBr, and BnOH-H<sub>2</sub>O) by using Multiwfn package at the B3LYP/ma-TZVPP level of theory within the EtOAc solvation.

**Table S2.** Transition compositions, electronic excitation energy (nm), and the corresponding oscillator strengths for D complex based on TD-DFT method.

| State                 | Transition   | Contrib. | E (nm) | <i>f</i> |
|-----------------------|--------------|----------|--------|----------|
| $T_0 \rightarrow T_1$ | HOMO->LUMO   | 98.2%    | 411.5  | 0.0034   |
| $T_0 \rightarrow T_2$ | HOMO->LUMO+1 | 97.6%    | 408.2  | 0.0104   |

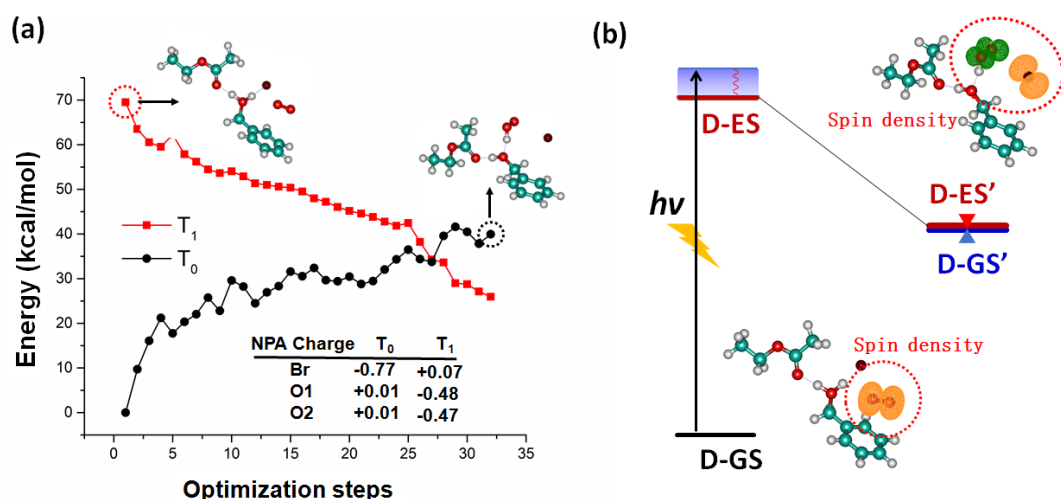

**Figure S15.** (a) Potential energy profile of ground state ( $T_0$ ) and first excited state ( $T_1$ ) of complex **D** in EtOAc through geometry relaxation on  $T_1$  PES at SMD/CAM-B3LYP-D3/TZVP level of theory. (b) Schematic view for the photoexcitation and conical intersection process. The conical intersection geometry is denoted by D-ES' and D-GS'; spin densities for D-GS and D-GS' are calculated by the Multiwfn package with the isovalue set as 0.005; the molecular structure was depicted by VMD.<sup>13</sup>

The geometry relaxation for the EtOAc solvated **D** on  $T_1$  potential energy surface (PES) was performed at the SMD/CAM-B3LYP-D3/TZVP level, as depicted in **Figure S15**. It shows that along structural optimization steps on  $T_1$  PES, the  $O_2$  group approaches to the hydroxyl-bonded proton and leads to the formation of OOH. **Figure S15(a)** reveals that there should be a conical intersection (CI) between  $T_1$  and ground state along the relaxation process, which leads to the recovery of ground state populations via  $T_0$ - $T_1$  CI. The conical intersection structure (D-GS'/ES') was optimized using TD-DFT method at the same level of theory with the convergence on  $T_1/T_0$  energy difference less than 0.0001 Hartree. Spin density analysis (**Figure S15(b)**) for ground state D-GS and CI structure was shown in **Figure S15(b)**. It indicates that in ground state D-GS the spin densities locate on

the O<sub>2</sub> molecule, revealing that **D**-GS is a triplet state. For the CI geometry (**D**-GS'), both the OOH and Br group have unpaired electrons, showing a typical double radical state. For this double radical state, the system has energy-equivalent states with spin multiplicities of singlet or triplet. Since the final products are all in singlet states, we consider this state as an open-shell singlet state and carried out calculations for the reaction process on the open-shell singlet state.

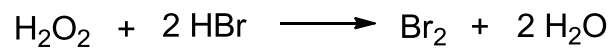

**Figure S16** The equation of the reaction of  $\text{H}_2\text{O}_2$  and  $\text{HBr}$

In  $\text{HBr}$  system, the in situ generated  $\text{H}_2\text{O}_2$  quickly reacts with  $\text{HBr}$  to produce  $\text{H}_2\text{O}$  and bromine.<sup>14, 15</sup> Since bromine is unstable in the presence of light, it decomposes to produce  $\text{Br}\cdot$  radical under light irradiation,<sup>16</sup> which involves in the photo-induced alcohol oxidation in Scheme 1.

## Spectral ( $^1\text{H}$ NMR & $^{13}\text{C}$ NMR) Data

The citation of reported product molecules provided with the the  $^1\text{H}$  NMR,  $^{13}\text{C}$  NMR, and HRMS data. As follow:

**2a-2f**, <sup>17</sup> **2g-2h**, <sup>18</sup> **2i-2j**, <sup>19</sup> **2k**, <sup>17</sup> **2l**, <sup>20</sup> **2m**, <sup>21</sup> **2n**, <sup>18</sup> **2o**, <sup>20</sup> **2p**, <sup>17</sup> **2q**, <sup>21</sup> **2r**, <sup>17</sup> **2s**, <sup>22</sup> **2t**, <sup>27</sup> **2u**, <sup>18</sup> **2v**, <sup>19</sup> **2w**, <sup>18</sup> **2x-2**, <sup>23</sup> **2aa**, <sup>27</sup> **2ab**, <sup>24</sup> **2ac**, <sup>25</sup> **2ad**, <sup>26</sup> **2ae**, <sup>27</sup> **2af**, <sup>19</sup> **2ag**, <sup>28</sup> **2ah**, <sup>19</sup> **2ai-2al**, <sup>27</sup> **2am**, <sup>19</sup> **2an**, <sup>27</sup> **2ao**, <sup>29</sup> **2ap**, <sup>28</sup> **2aq**.<sup>31</sup>

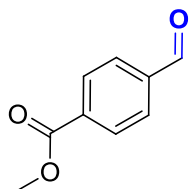

Compound **2o**: methyl 4-formylbenzoate

$^1\text{H}$  NMR: (400 MHz,  $\text{CDCl}_3$ )  $\delta$  10.10 (s, 1H), 8.20 (d,  $J$  = 8.0 Hz, 1H), 7.95 (d,  $J$  = 8.0 Hz, 2H), 3.96 (s, 3H);  $^{13}\text{C}$  NMR: (100 MHz,  $\text{CDCl}_3$ )  $\delta$  191.8, 166.2, 139.3, 135.3, 130.4, 129.8, 52.7.

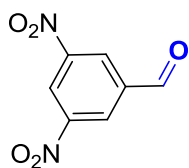

Compound **2s**: 3, 5-dinitrobenzaldehyde

$^1\text{H}$  NMR: (400 MHz,  $\text{CDCl}_3$ )  $\delta$  10.22 (s, 1H), 9.28 (t,  $J$  = 2.0 Hz, 1H), 9.04 (d,  $J$  = 2.0 Hz, 1H);  $^{13}\text{C}$  NMR: (100 MHz,  $\text{CDCl}_3$ )  $\delta$  187.2, 149.4, 138.7, 128.8, 123.4.

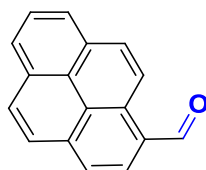

Compound **2w**: pyrene-1-carbaldehyde

$^1\text{H}$  NMR: (400 MHz,  $\text{CDCl}_3$ )  $\delta$  10.74 (s, 1H), 9.36 (d,  $J$  = 8.8 Hz, 1H), 8.38 (d,  $J$  = 8.0 Hz, 1H), 8.28-8.25 (m, 3H), 8.20-8.17 (m, 2H), 8.08-8.03 (m, 2H);  $^{13}\text{C}$  NMR: (100 MHz,  $\text{CDCl}_3$ )  $\delta$  193.2, 135.6, 131.4, 131.1, 131.0, 130.9, 130.8, 130.5, 127.5, 127.3, 127.1, 126.9, 126.7, 124.7, 124.6, 124.1, 123.1.

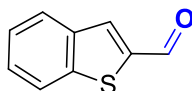

Compound **2y**: benzo[b]thiophene-2-carbaldehyde

$^1\text{H}$  NMR: (400 MHz,  $\text{CDCl}_3$ )  $\delta$  10.11 (s, 1H), 8.03 (s, 1H), 7.91 (dd,  $J$  = 8.0 Hz, 8.0 Hz, 2H), 7.52 (t,  $J$  = 7.6 Hz, 1H), 7.45 (t,  $J$  = 7.6 Hz, 1H);  $^{13}\text{C}$  NMR: (100 MHz,  $\text{CDCl}_3$ )  $\delta$  184.8, 143.5, 142.8, 138.7, 134.6, 128.3, 126.4, 125.4, 123.5.

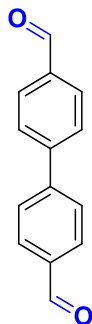

Compound **2ab**: [1,1'-biphenyl]-4,4'-dicarbaldehyde

$^1\text{H}$  NMR: (400 MHz,  $\text{CDCl}_3$ )  $\delta$  10.09 (s, 2H), 7.99 (d,  $J$  = 8.0 Hz, 4.8 Hz, 4H), 7.80 (d,  $J$  = 4.8 Hz, 4H);  $^{13}\text{C}$  NMR: (100 MHz,  $\text{CDCl}_3$ )  $\delta$  191.8, 145.7, 136.0, 130.5, 128.2.

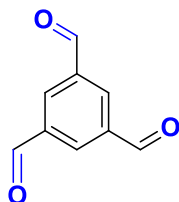

Compound **2ac**: benzene-1,3,5-tricarbaldehyde

$^1\text{H}$  NMR: (400 MHz,  $\text{CDCl}_3$ )  $\delta$  10.20 (s, 3H), 8.64 (s, 3H);  $^{13}\text{C}$  NMR: (100 MHz,  $\text{CDCl}_3$ )  $\delta$  190.0, 137.9, 134.9.

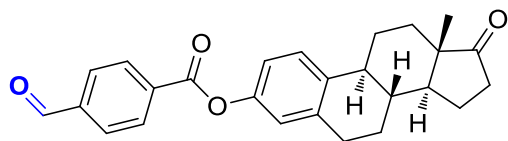

Compound **2ad**:

(8R,9S,13S,14S)-13-methyl-17-oxo-7,8,9,11,12,13,14,15,16,17-decahydro-6H-cyclopenta[a]phenanthren-3-yl 4-formylbenzoate

$^1\text{H}$  NMR: (700 MHz,  $\text{CDCl}_3$ )  $\delta$  10.13 (s, 1H), 8.34 (d,  $J$  = 8.4 Hz, 2H), 8.01 (d,  $J$  = 8.4 Hz, 2H), 7.35 (d,  $J$  = 8.4 Hz, 1H), 7.00 (d,  $J$  = 8.4 Hz, 1H), 6.95 (d,  $J$  = 8.4 Hz, 1H), 2.94 (dd,  $J$  = 8.4 Hz, 2H), 2.51 (dd,  $J$  = 8.4 Hz, 1H), 2.45-2.41 (m, 1H), 2.34-2.30 (m, 1H), 2.18-2.11 (m, 1H), 2.09-2.02 (m, 2H), 1.99-1.97 (m, 1H), 1.67-1.61 (m, 2H), 1.59-1.46 (m, 4H), 0.92 (s, 3H);  $^{13}\text{C}$  NMR: (150 MHz,  $\text{CDCl}_3$ )  $\delta$  191.7, 164.6, 148.7, 139.6, 138.4, 137.9, 134.7, 130.8, 129.7, 126.7, 121.6, 118.8, 50.5, 48.0, 44.3, 38.1, 36.0, 31.7, 29.8, 29.6, 26.4, 25.9, 21.7, 13.9.

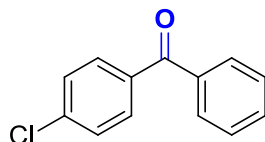

Compound **2af**: (4-chlorophenyl)(phenyl)methanone

$^1\text{H}$  NMR: (400 MHz,  $\text{CDCl}_3$ )  $\delta$  7.76 (t,  $J$  = 6.8 Hz, 4H), 7.60 (t,  $J$  = 6.8 Hz, 1H), 7.44 (dd,  $J$  = 8.0 Hz, 7.6 Hz, 4H);  $^{13}\text{C}$  NMR: (100 MHz,  $\text{CDCl}_3$ )  $\delta$  195.6, 139.0, 137.4, 136.0, 132.8, 131.6, 130.0, 128.8, 128.5.

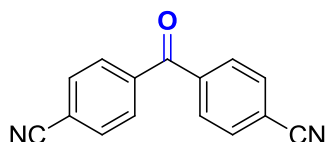

Compound **2ag**: 4,4'-carbonyldibenzonitrile



$^1\text{H}$  NMR: (400 MHz,  $\text{CDCl}_3$ )  $\delta$  7.87 (d,  $J$  = 7.6 Hz, 4H), 7.82 (d,  $J$  = 7.6 Hz, 4H);  $^{13}\text{C}$  NMR: (100 MHz,  $\text{CDCl}_3$ )  $\delta$  193.5, 139.8, 132.6, 130.3, 117.8, 116.6.

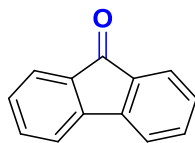

Compound **2ah**: 9H-fluoren-9-one

$^1\text{H}$  NMR: (400 MHz,  $\text{CDCl}_3$ )  $\delta$  7.64 (d,  $J$  = 7.6 Hz, 2H), 7.50-7.44 (m, 4H), 7.29-7.25 (m, 2H);  $^{13}\text{C}$  NMR: (100 MHz,  $\text{CDCl}_3$ )  $\delta$  194.0, 144.5, 134.8, 134.2, 129.1, 124.4, 120.4.

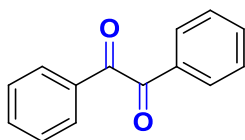

Compound **2ai**: benzophenone

$^1\text{H}$  NMR: (400 MHz,  $\text{CDCl}_3$ )  $\delta$  7.98 (d,  $J$  = 7.6 Hz, 4H), 7.66 (t,  $J$  = 7.6 Hz, 2H), 7.51 (t,  $J$  = 7.6 Hz, 4H);  $^{13}\text{C}$  NMR: (100 MHz,  $\text{CDCl}_3$ )  $\delta$  194.7, 135.0, 133.1, 130.0, 129.2.

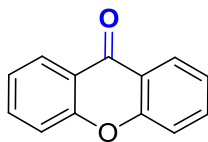

Compound **2ak**: 9H-xanthen-9-one

$^1\text{H}$  NMR: (400 MHz,  $\text{CDCl}_3$ )  $\delta$  8.33 (dd,  $J$  = 8.0 Hz, 8.0 Hz, 2H), 7.73-7.69 (m, 2H), 7.48 (d,  $J$  = 7.6 Hz, 2H), 7.39-7.35 (m, 2H);  $^{13}\text{C}$  NMR: (100 MHz,  $\text{CDCl}_3$ )  $\delta$  177.4, 156.3, 134.9, 126.9, 124.0, 122.0, 118.1;

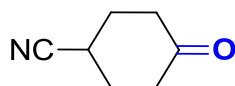

Compound **2ao**: 4-oxocyclohexanecarbonitrile

$^1\text{H}$  NMR: (400 MHz,  $\text{CDCl}_3$ )  $\delta$  3.03-2.98 (m, 1H), 2.59-2.52 (m, 2H), 2.41-2.34 (m, 2H), 2.21-2.09 (m, 4H);  $^{13}\text{C}$  NMR: (100 MHz,  $\text{CDCl}_3$ )  $\delta$  207.3, 120.6, 38.6, 29.1, 26.4.

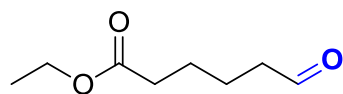

Compound **2aq**: ethyl 6-oxohexanoate

$^1\text{H}$  NMR: (400 MHz,  $\text{CDCl}_3$ )  $\delta$  9.73 (1H), 4.09 (q,  $J = 7.2$  Hz, 2H), 2.45-2.41 (m, 2H), 2.31-2.27 (m, 2H), 1.65-1.61 (m, 4H), 1.22 (t,  $J = 7.2$  Hz, 3H);  $^{13}\text{C}$  NMR: (100 MHz,  $\text{CDCl}_3$ )  $\delta$  202.2, 173.3, 60.4, 3.6, 34.0, 24.4, 21.6, 14.3.

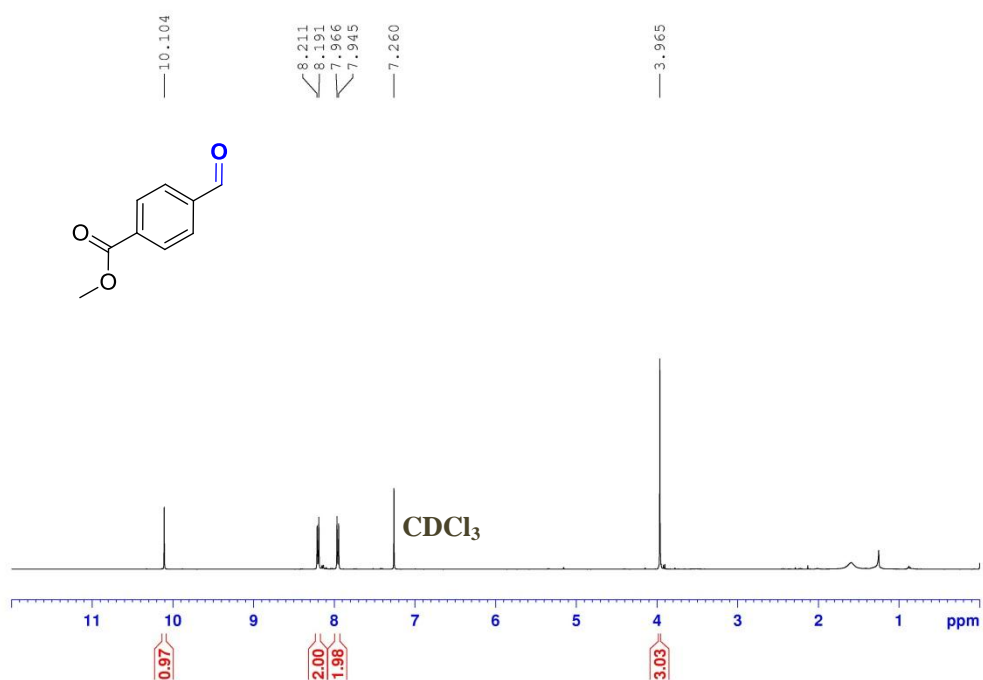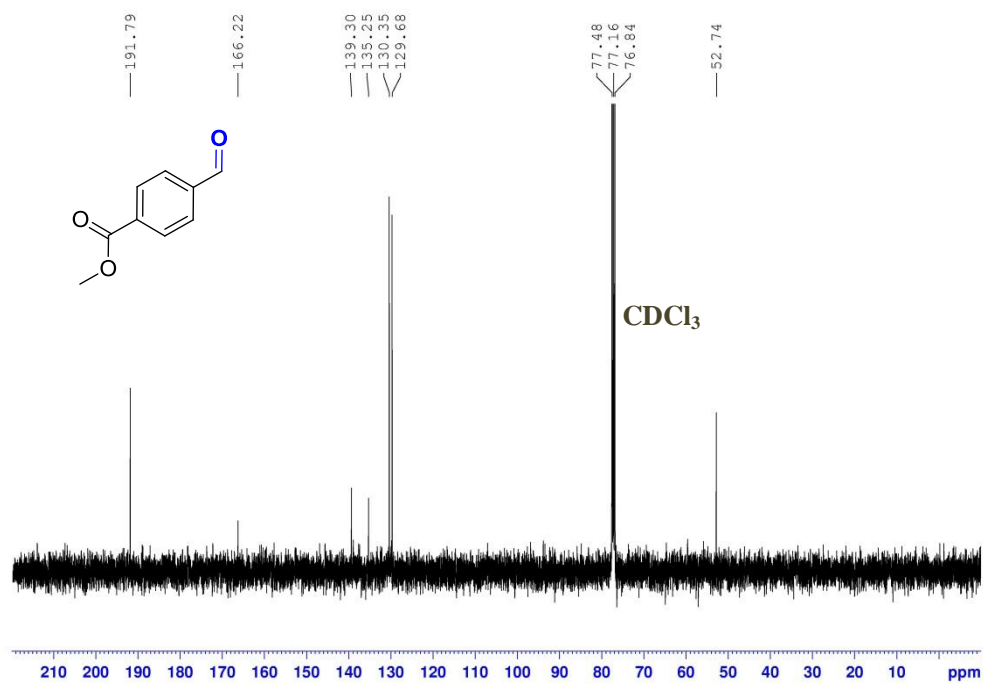

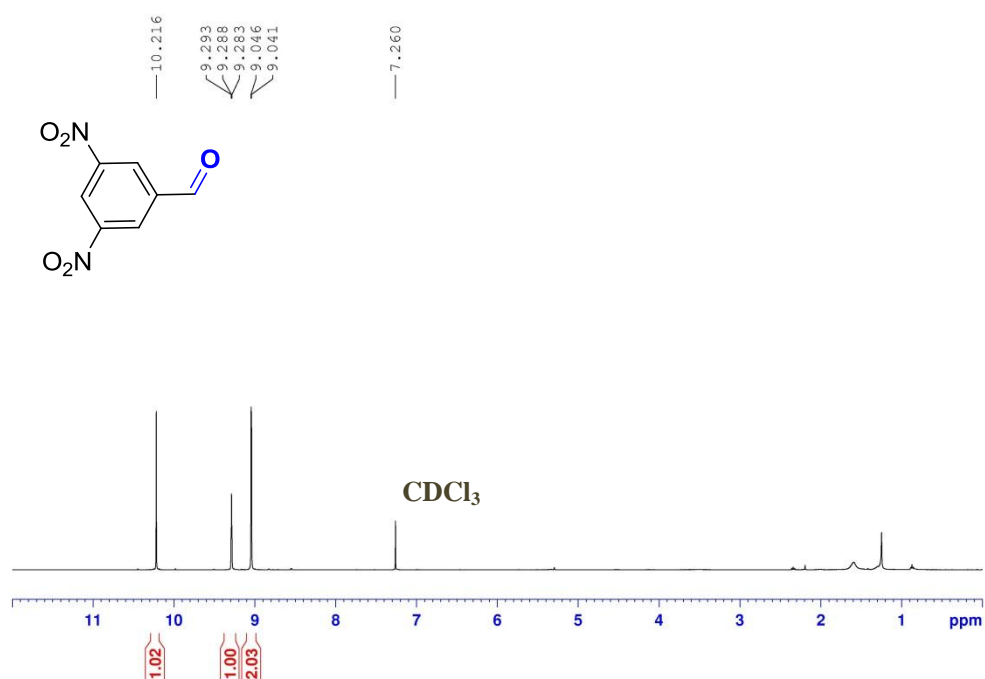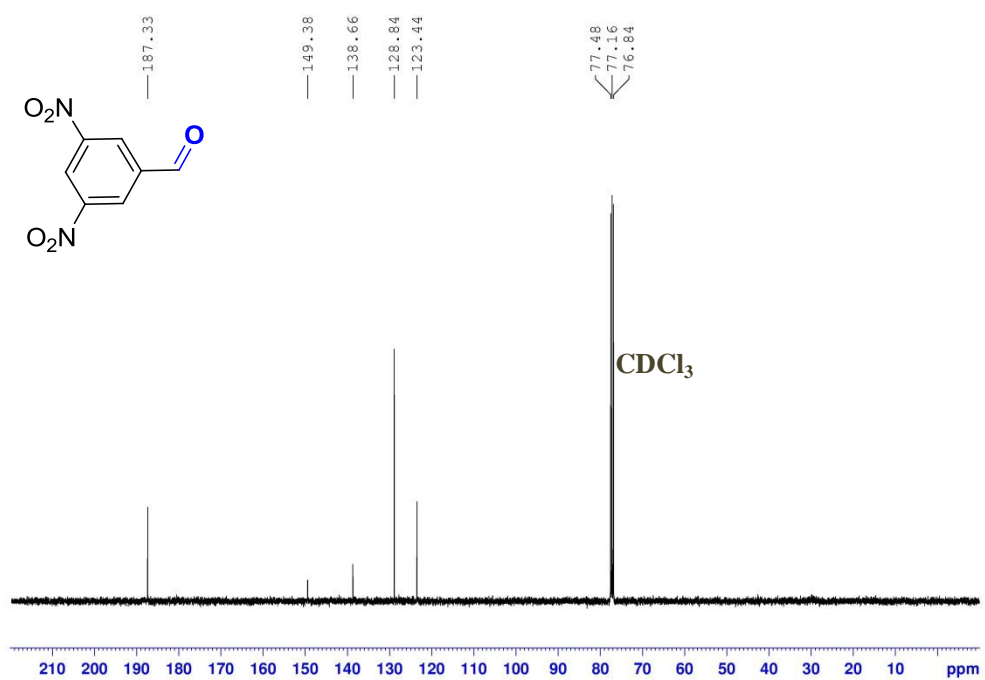

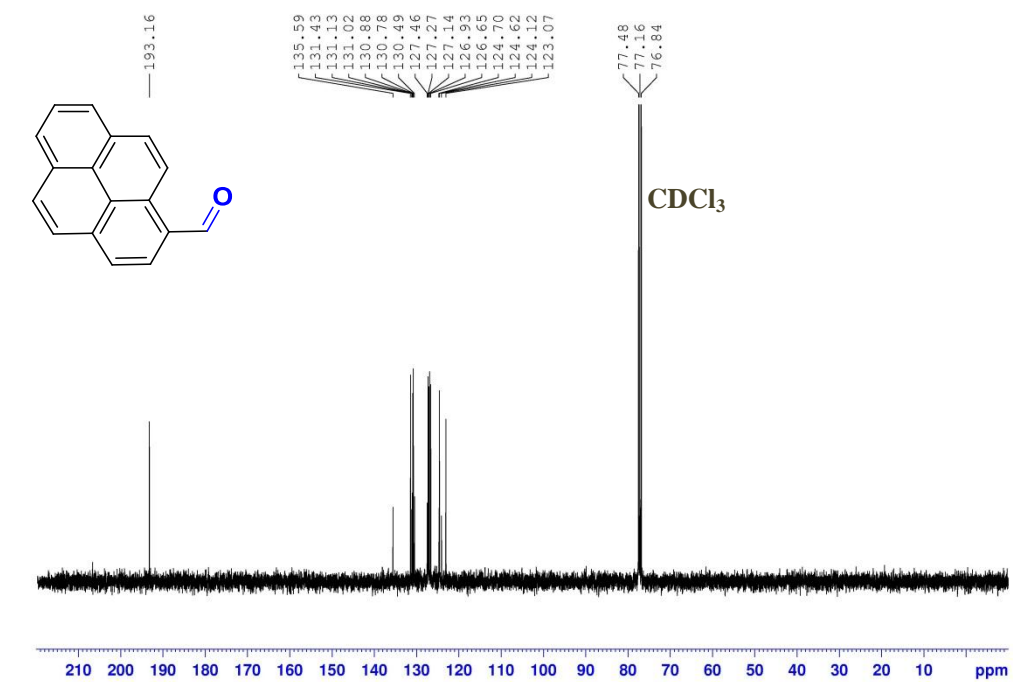

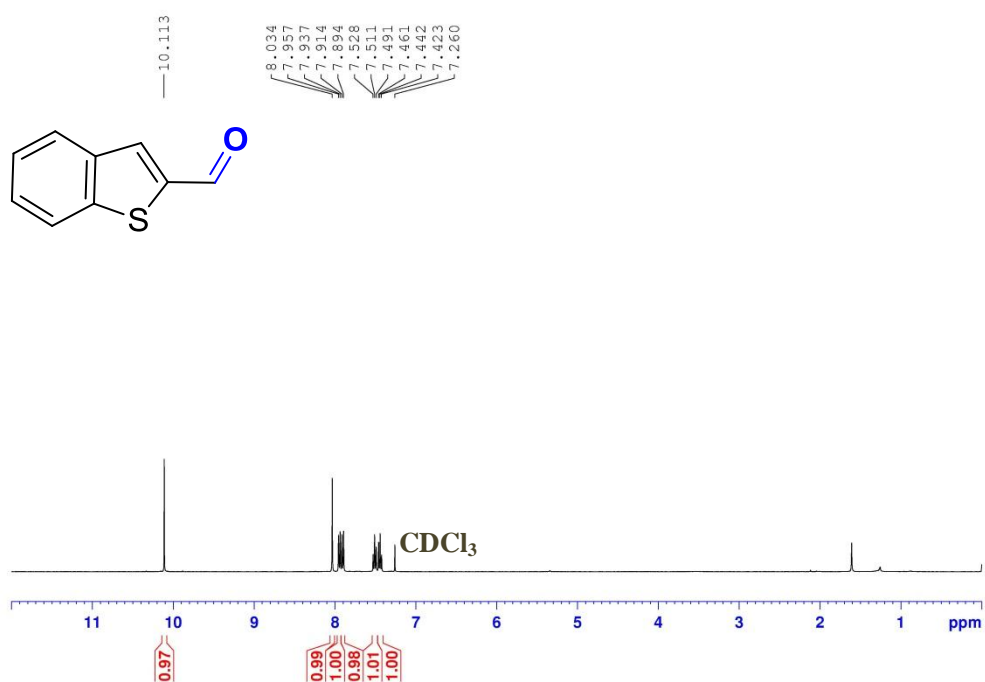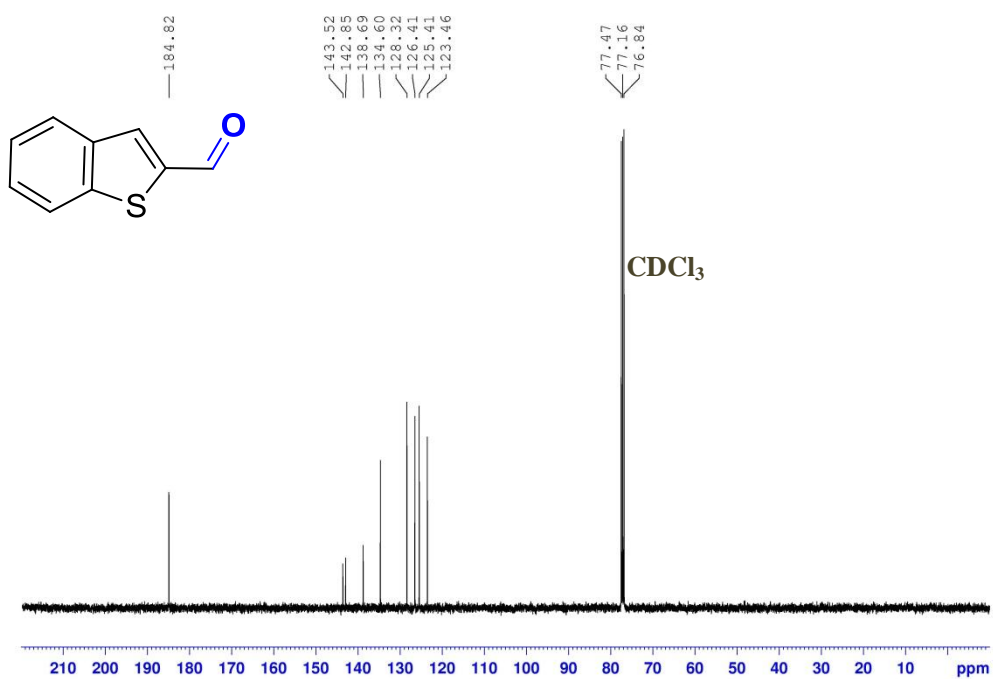

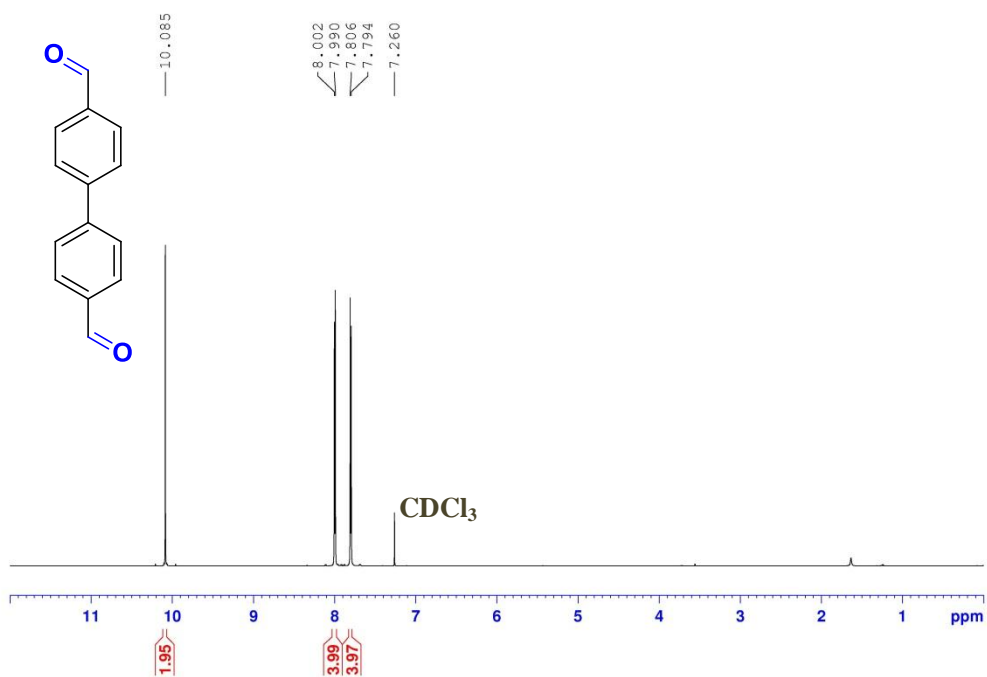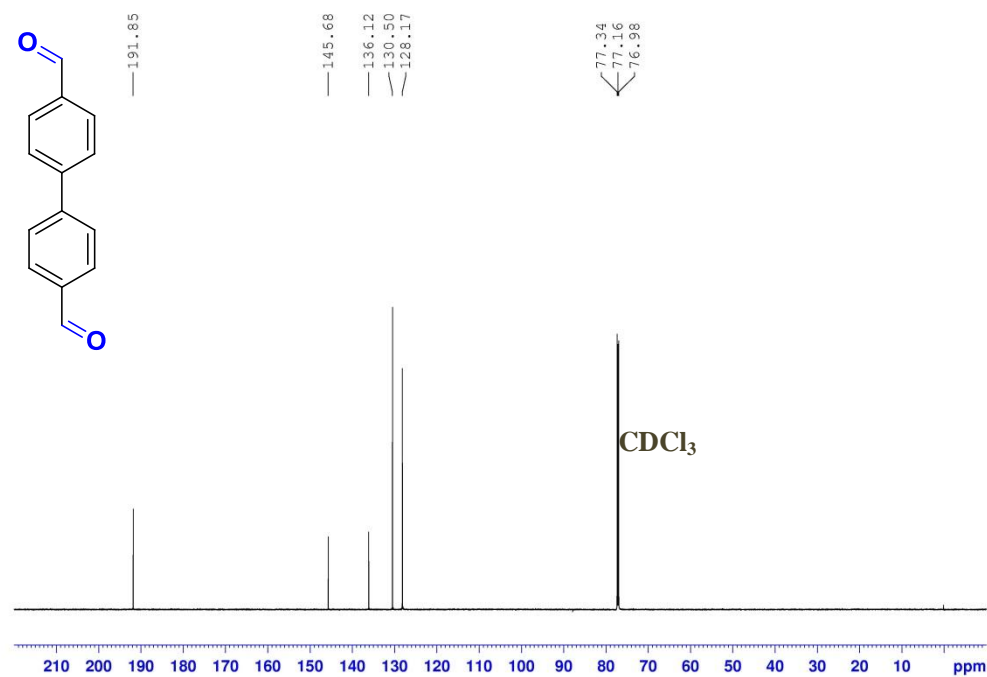

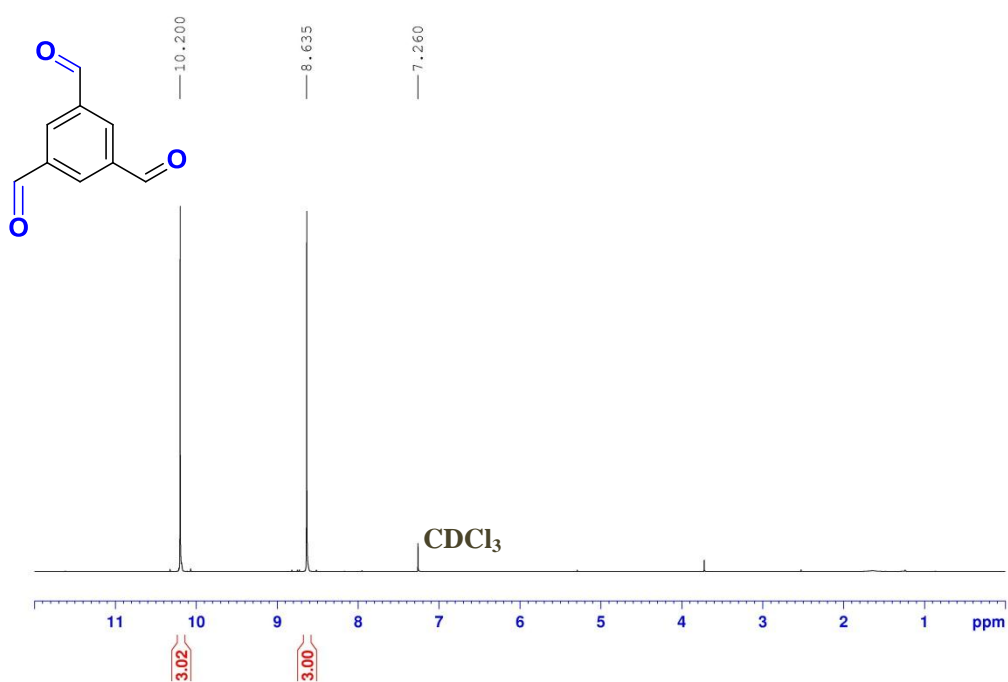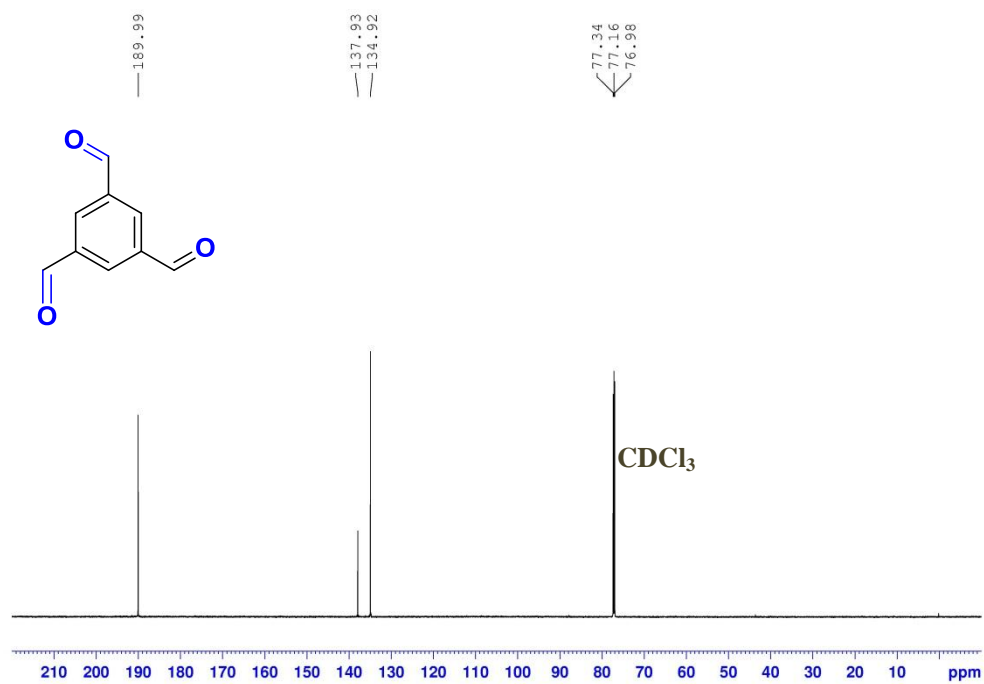



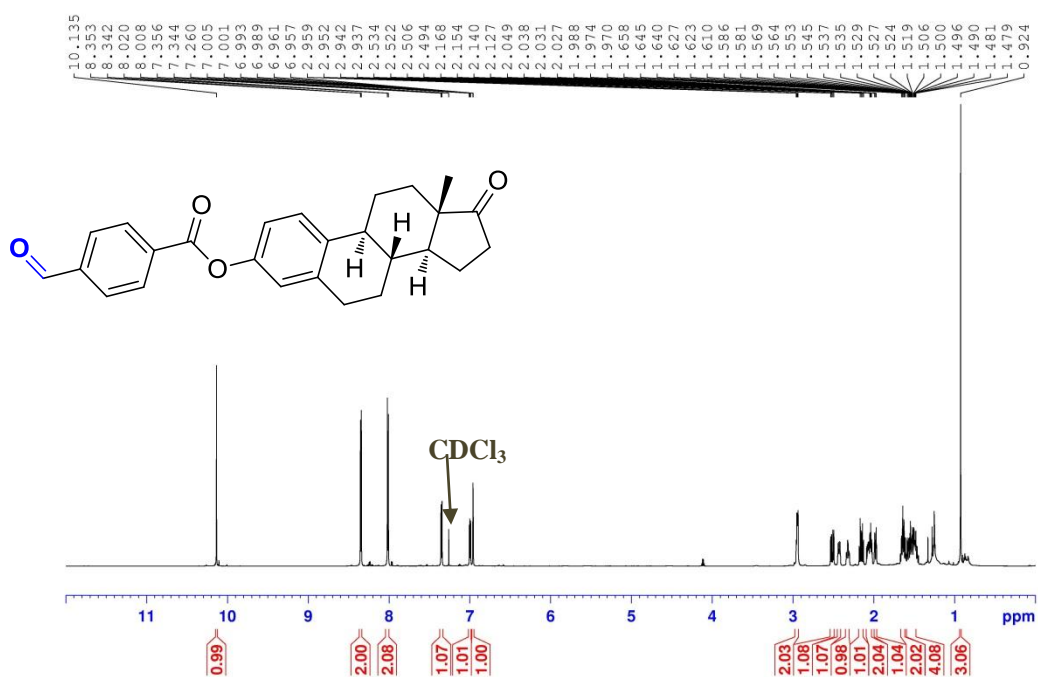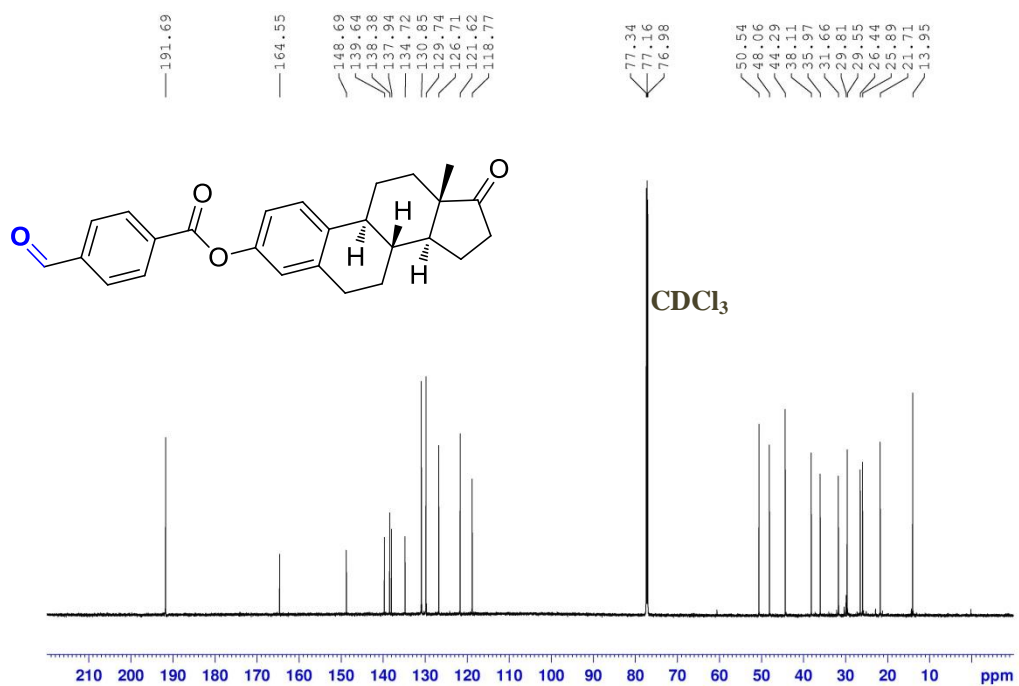

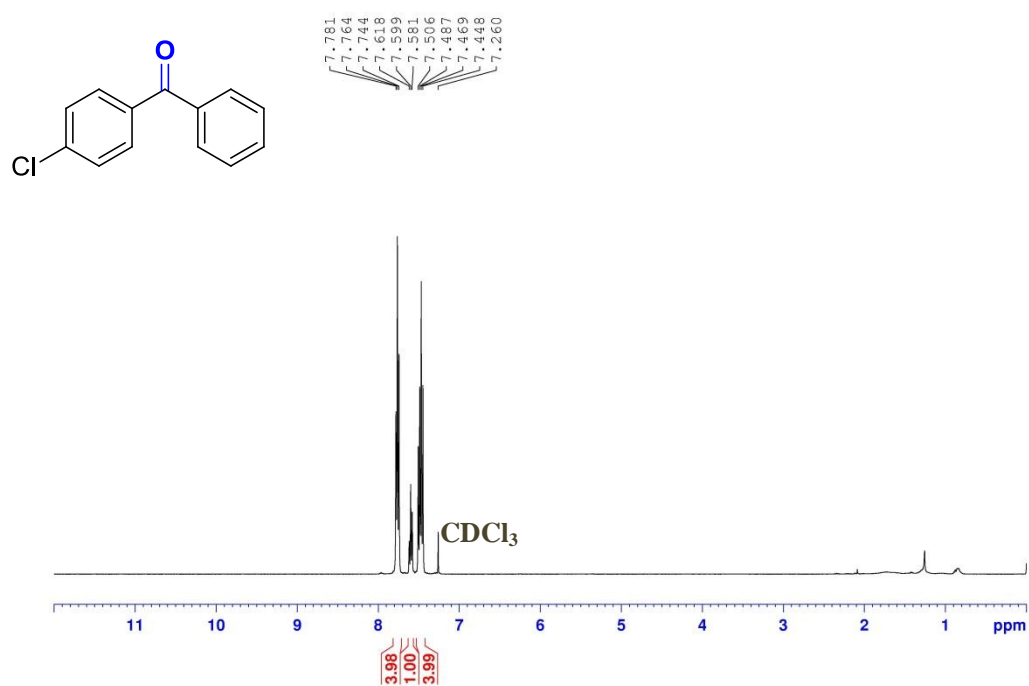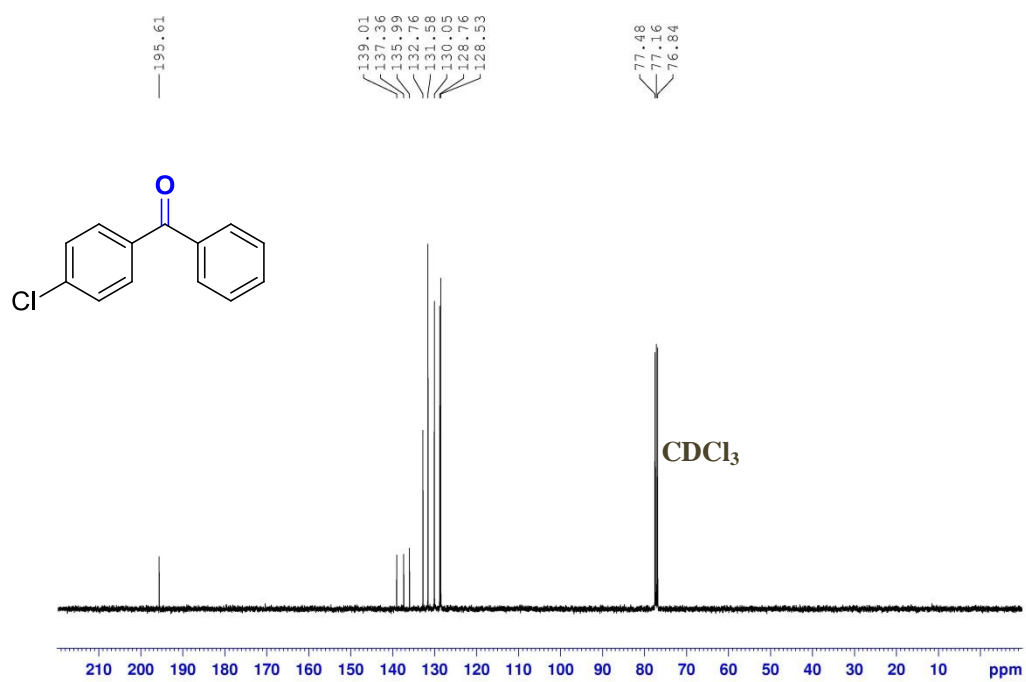

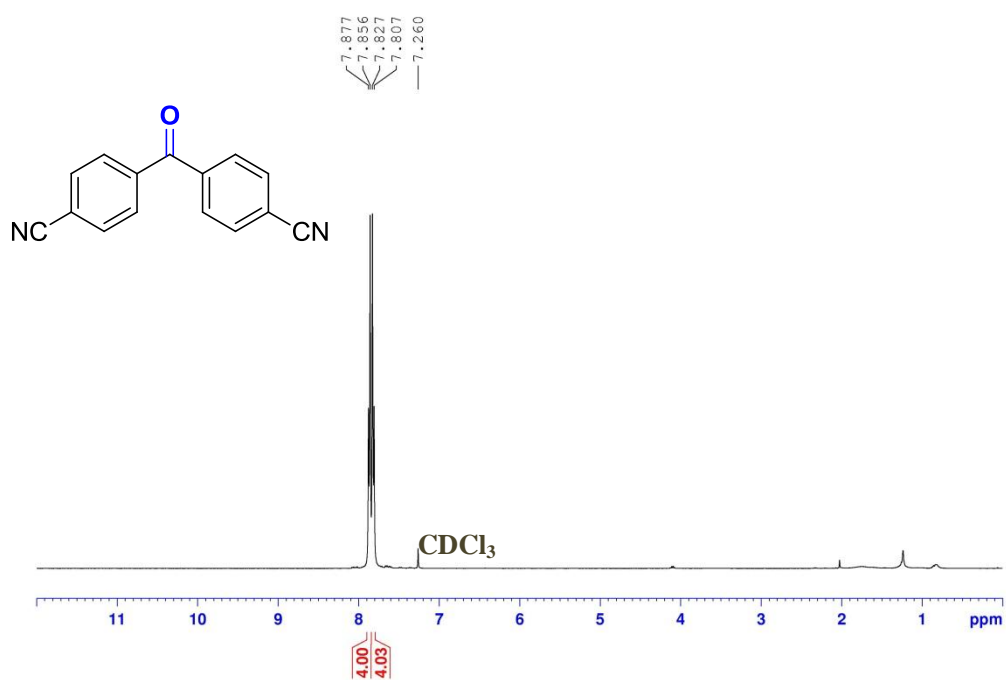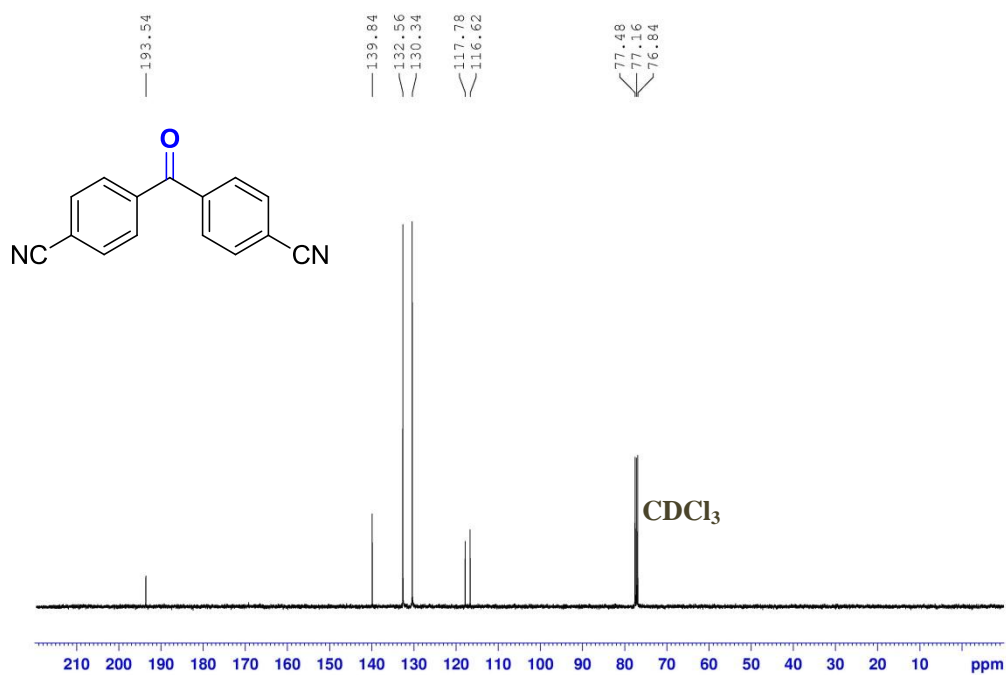

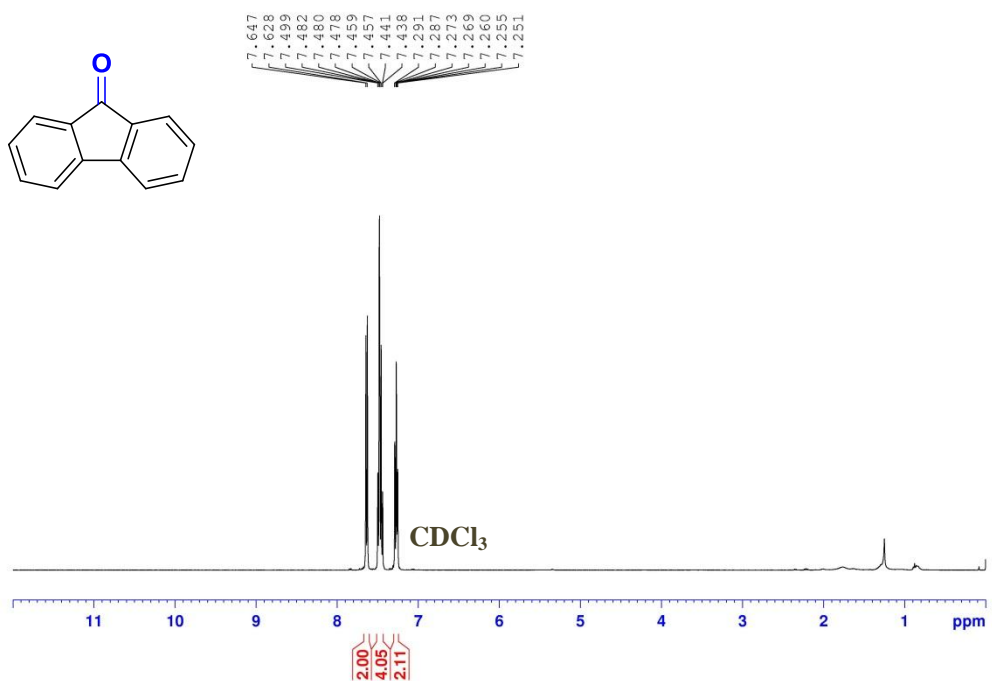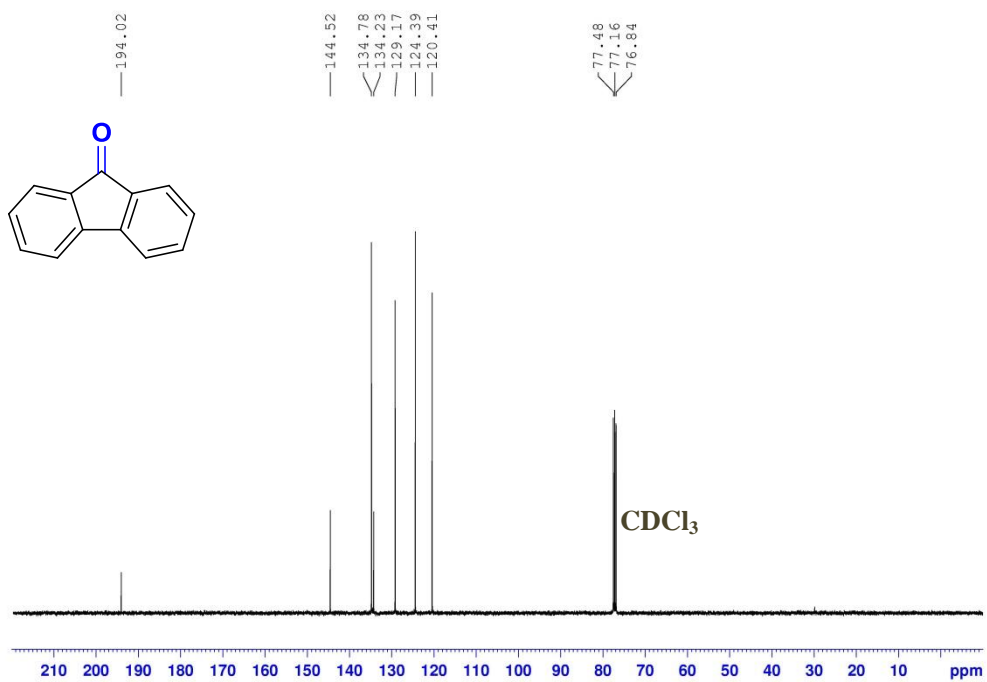

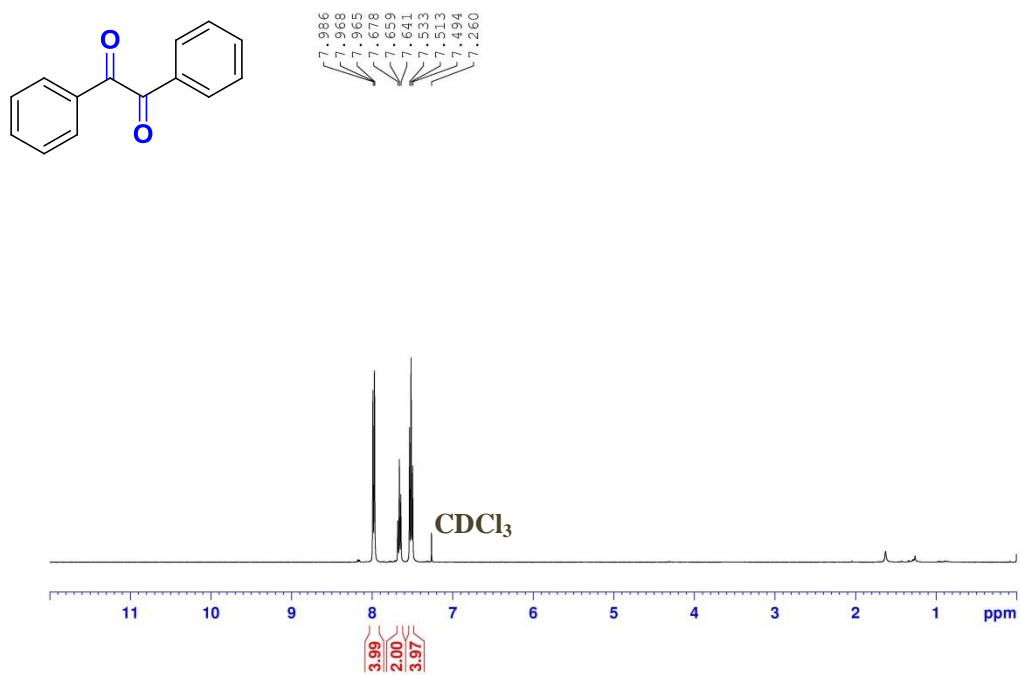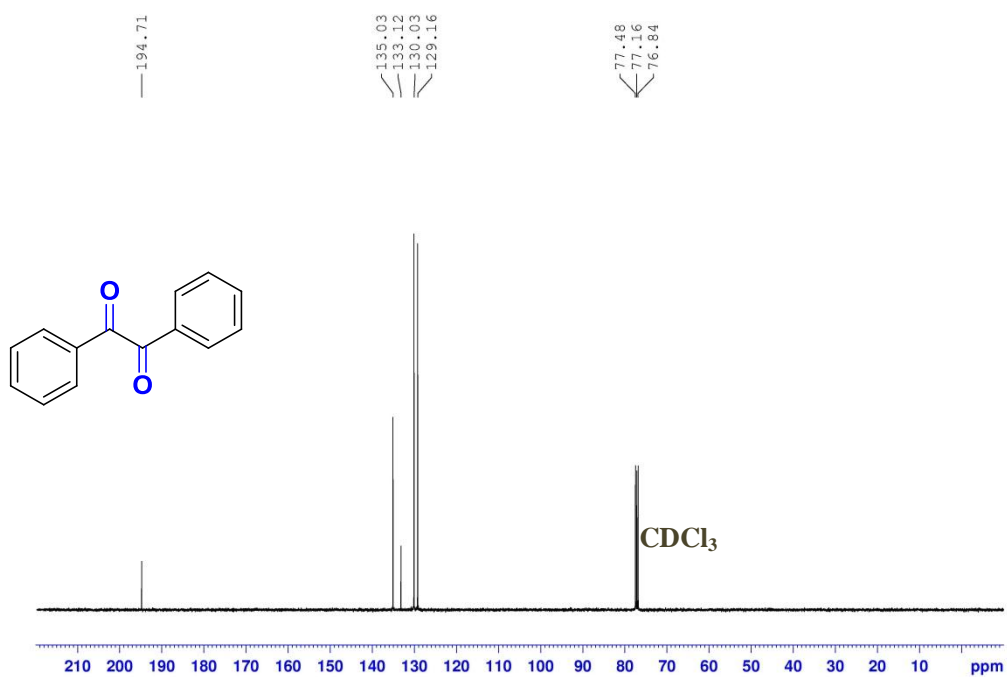

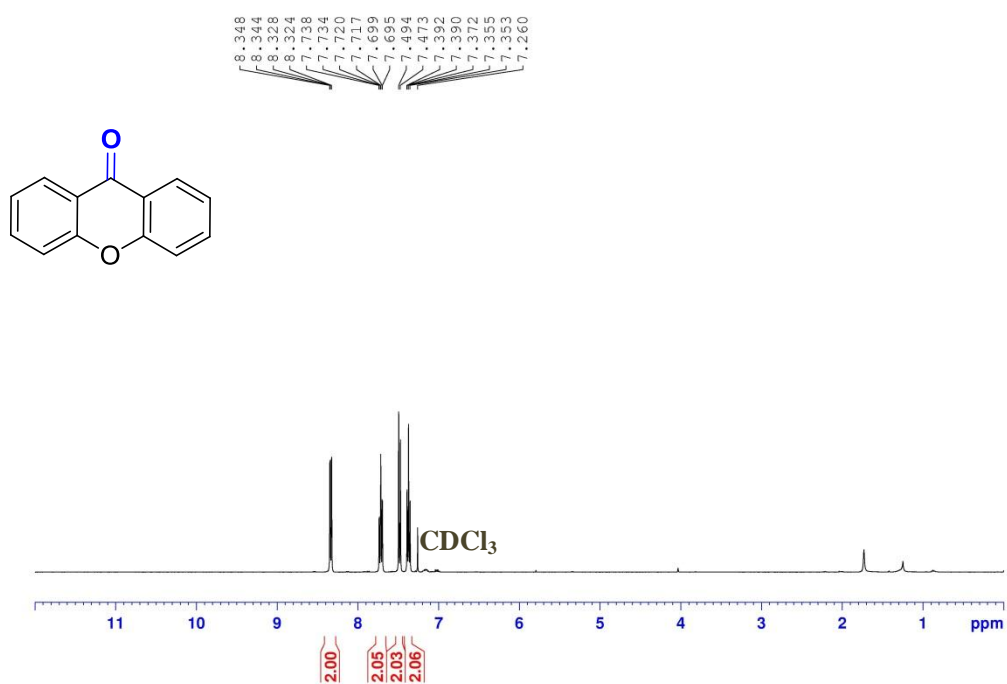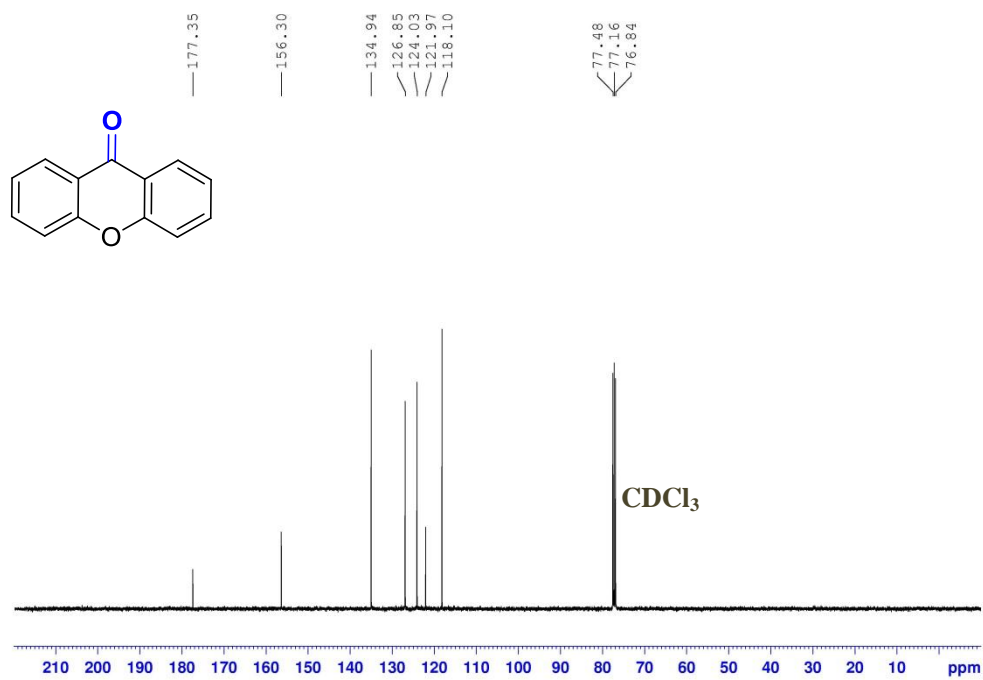

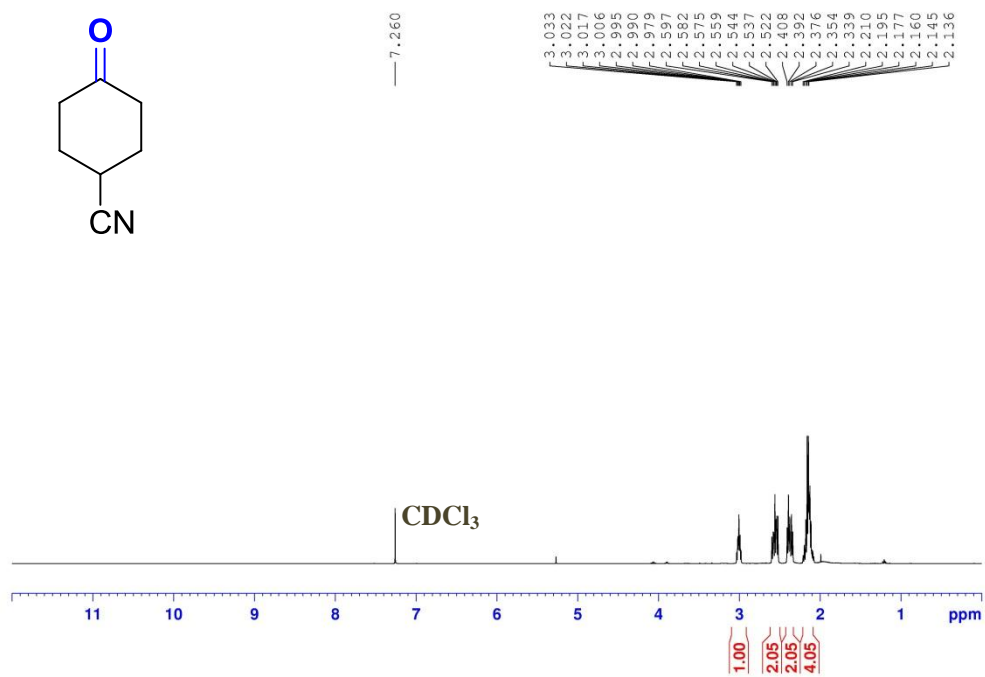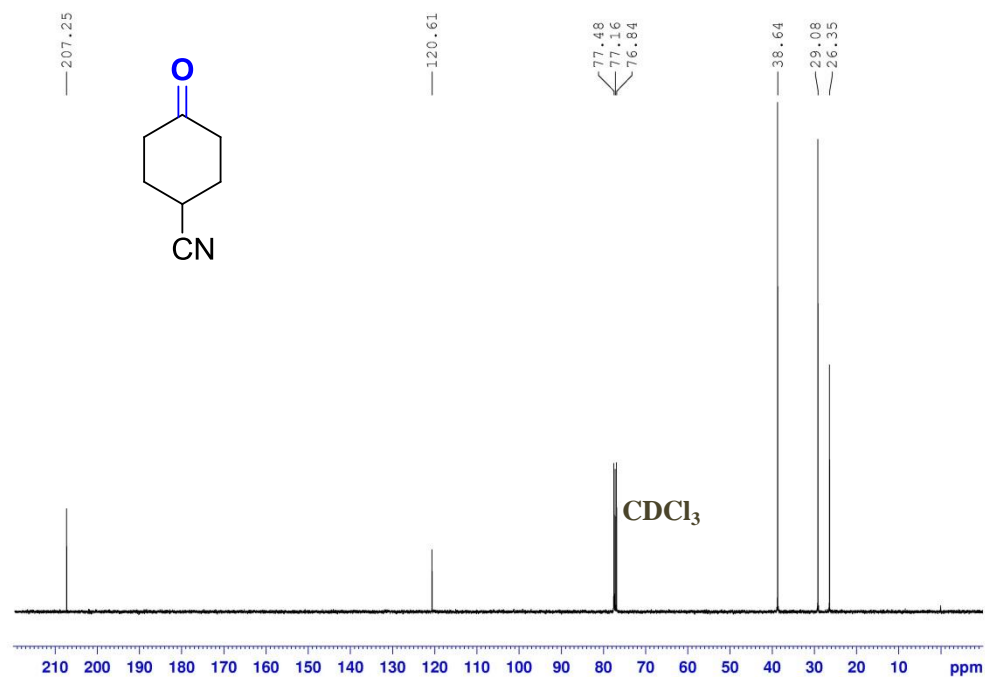

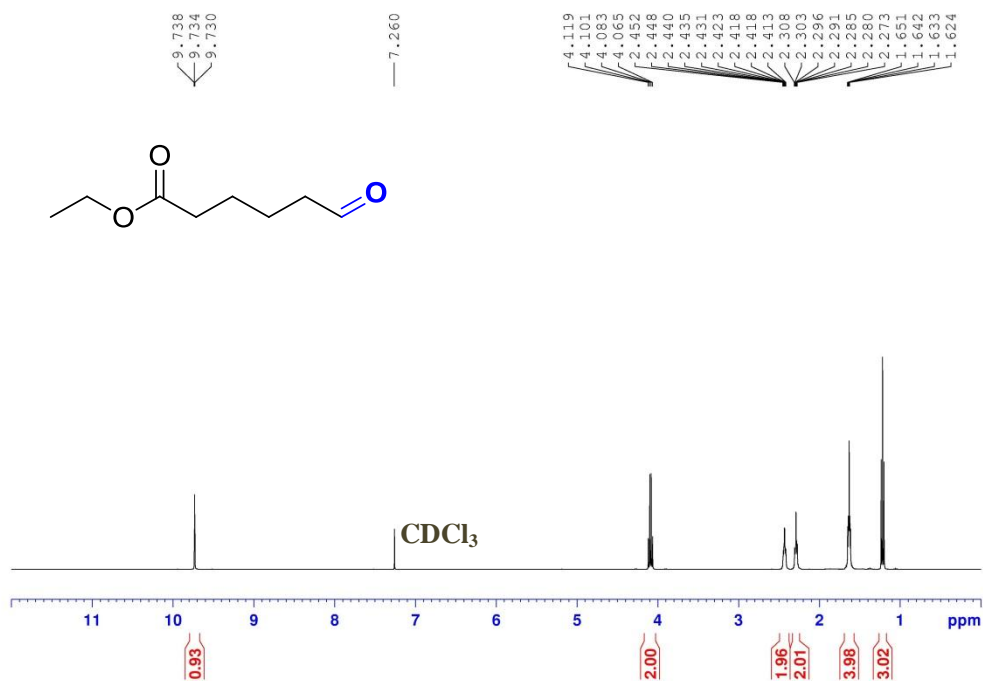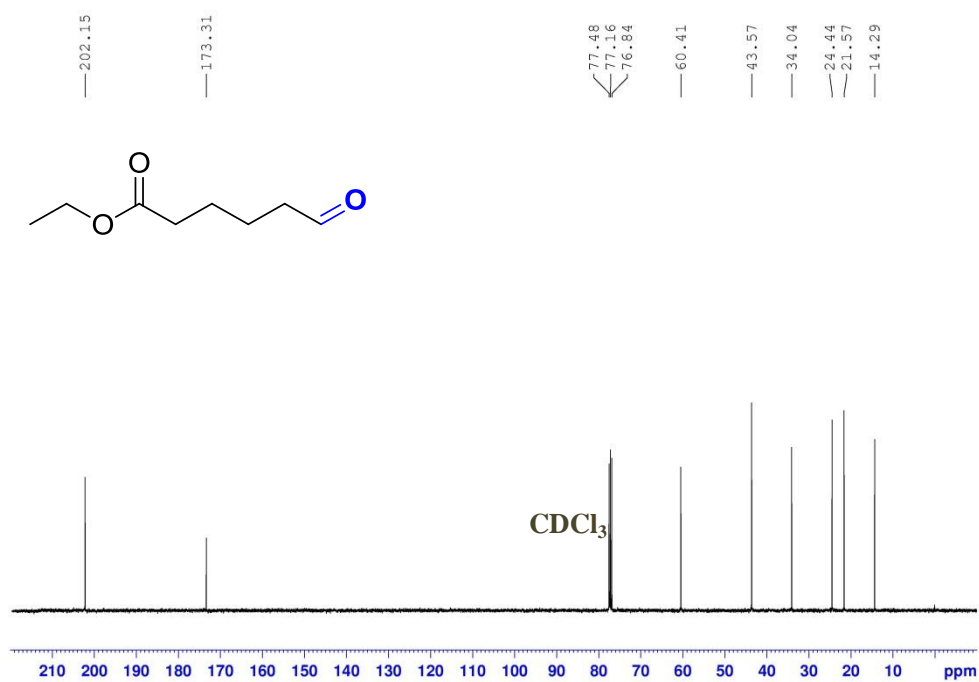



## References

1. M. J. Frisch, G. W. Trucks, H. B. Schlegel, G. E. Scuseria, M. A. Robb, J. R. Cheeseman, G. Scalmani, V. Barone, G. A. Petersson, H. Nakatsuji, X. Li, M. Caricato, A. V. Marenich, J. Bloino, B. G. Janesko, R. Gomperts, B. Mennucci, H. P. Hratchian, J. V. Ortiz, A. F. Izmaylov, J. L. Sonnenberg, Williams, F. Ding, F. Lipparini, F. Egidi, J. Goings, B. Peng, A. Petrone, T. Henderson, D. Ranasinghe, V. G. Zakrzewski, J. Gao, N. Rega, G. Zheng, W. Liang, M. Hada, M. Ehara, K. Toyota, R. Fukuda, J. Hasegawa, M. Ishida, T. Nakajima, Y. Honda, O. Kitao, H. Nakai, T. Vreven, K. Throssell, J. A. Montgomery Jr., J. E. Peralta, F. Ogliaro, M. J. Bearpark, J. J. Heyd, E. N. Brothers, K. N. Kudin, V. N. Staroverov, T. A. Keith, R. Kobayashi, J. Normand, K. Raghavachari, A. P. Rendell, J. C. Burant, S. S. Iyengar, J. Tomasi, M. Cossi, J. M. Millam, M. Klene, C. Adamo, R. Cammi, J. W. Ochterski, R. L. Martin, K. Morokuma, O. Farkas, J. B. Foresman and D. J. Fox, *Journal*, 2016.
2. A. V. Marenich, C. J. Cramer and D. G. Truhlar, *J Phys Chem B*, 2009, **113**, 6378-6396.
3. J. D. Chai and M. Head-Gordon, *Phys Chem Chem Phys*, 2008, **10**, 6615-6620
4. A. Schafer, C. Huber and R. Ahlrichs, *J Chem Phys*, 1994, **100**, 5829-5835.
5. S. Grimme, S. Ehrlich and L. Goerigk, *J Comput Chem*, 2011, **32**, 1456-1465.
6. Y. Minenkov, A. Singstad, G. Occhipinti and V. R. Jensen, *Dalton T*, 2012, **41**, 5526-5541.
7. A. D. Laurent and D. Jacquemin, *Int J Quantum Chem*, 2013, **113**, 2019-2039.
8. T. Lu and F. W. Chen, *J Comput Chem*, 2012, **33**, 580-592.
9. F. Neese, F. Wennmohs, U. Becker and C. Riplinger, *J Chem Phys*, 2020, **152**.
10. W. M. Haynes, CRC handbook of chemistry and physics. CRC press 2016.
11. R. Christian, T. Welton, Solvents and solvent effects in organic chemistry. John Wiley & Sons, 2011.
12. S. Emamian, T. Lu, H. Kruse, H. Emamian, *J. Comput. Chem.*, 2019, **40**, 2868-2881
13. W. Humphrey, A. Dalke and K. Schulten, *J Mol Graph Model*, 1996, **14**, 33-38.
14. N. B. Barhate, A. S. Gajare, R. D. Wakharkar, A. V. Bedekar, *Tetrahedron*, 1999, **55**, 11127-11142.
15. G. I. Nikishin, N. I. Kapustina, L. L. Sokova, O. V. Bitjukov, A. O. Terent'ev, *RSC Adv.*, 2018, **8**, 28632-28636.
16. X. Cao, L. Wei, J. Yang, H. Song, Y. Wei, *Org. Biomol. Chem.*, 2024, **22**, 1157-1161.
17. J. Xu, Y. L. Zhang, X. G. Yue, J. Huo, D. K. Xiong, and P. F. Zhang, *Green Chem.* 2021, **23**, 5549-5555.
18. H. Huang, C. G. Yu, X. M. Li, Y. Q. Zhang, Y. T. Zhang, X. B. Chen, P. S. Mariano, H. X. Xie, and W. Wang, *Angew Chem Int Ed* 2017.56, 8201-8205.
19. Z. Bazyar, and M. Hosseini-Sarvari, *J. Org. Chem.* 2019, **84**, 13503-13515..
20. G. F. Zha, W. Y. Fang, J. Leng, and H. L. Qin, *Adv. Synth. Catal.* 2019, **361**, 2262-2267.
21. N. C. Jana, S. Behera, S. K. Maharana, R. R. Behera, and B. Bagh, *Catal. Sci. Technol.* 2023,**13**, 5422-5434.
22. R. R. Perrotta, A. H. Winter, W. H. Coldren, and D. E. Falvey. *J. Am. Chem. Soc.* 2011, **133**, 15553-15558.
23. M. Iinuma, K. Moriyama, and H. Togo *Eur. J. Org. Chem.* 2014, 772-780.
24. X. Z. Tian, Y. G. Guo, W. K. An, Y. L. Ren, Y. C. Qin, C. Y. Niu, and X. Zheng. *Nat. Commun.* 2022.**13**. 6186-6190.

25. C. Hu, V. C., Merchant, R. R., S. J. Chen, J. M. E. Hughes, B. K., Peters and T. Qin *J. Am. Chem. Soc.* 2023, **145**, 25-31.
26. X. P., Jiang, G. Wang, Z. C. Zheng, X. H. Yu, Y. Hong, H. Q. Xia, and C. M. Yu, *Org. Lett.* 2020, **22**, 9762-9766.
27. W. Schilling, D. Riemer, Y. Zhang, N. Hatami, and S. Das, *ACS Catal.* 2018, **8**, 5425-5430.
28. K. Kobayashi, Y. Nishimura, F. X. Gao, K. Gotoh, Y. Nishihara, and K. Takagi. *J. Org. Chem.* 2011, **76**, 1949-1952.
29. K. Kim, S. Lee, and S. H. Hong *Org. Lett.* 2021. **23**, 5501-5505..
30. T. Fujihara, C. Cong, J. Terao, and Y. Tsuji *Adv. Synth. Catal.* 2013. **355**, 3420-3424.
31. B. Ardiansah, H. Tanimoto, T. Tomohiro, T. Morimoto, and K. Kakiuchi *Chem. Commun.* 2021, **57**, 8738-8741.
